# Supplementary material for: An L1 box binding protein, GbML1, interacts with GbMYB25 to control cotton fibre development
Source: PubMed Central journal article supplement — J Exp Bot. 2010 Jul 28;61(13):3599–613. doi: 10.1093/jxb/erq173 (PMC2921199; doi:10.1093/jxb/erq173), 2010-07-28
Supplement: erq173_1.pdf [file erq173_1.pdf]

## Legends for supplementary data

**Supplementary Figure 1.** Alignment of different domains. (A) HD domain. (B) ZLZ domain. The cysteins that could form a zip structure are boxed. (C) START-SAD domain. The point mutations are indicated in the figure.

**Supplementary Figure 2.** (A) Expression of proteins used in binding assay. HD (aa 1-115), HD-ZLZ (aa 1-237), START-SAD (aa 238-725). GbML1 indicates the full-length protein. MBP indicates maltose binding protein. All parts of GbML1 are fused in frame to MBP. The purified MBP or MBP fusion proteins are separated by SDS-PAGE gel and stained by Coomassie Blue. Arrow indicated the cloned protein with correct size. (B) The purified proteins used in point mutation assay. (C) Coomassie Blue staining of a native gel that containing the binding mix with GbML1 full-length protein or HD-ZLZ protein. Arrows indicate the binding mix, which is also detected in figure 2, panel D.

**Supplementary Figure 3.** The property of the sequence in *GbML1* promoter region. The promoter sequence is analyzed using PLACE (<http://www.dna.affrc.go.jp/PLACE/>, Higo et al., 1999).

**Supplementary Figure 4.** Yeast transactivation assay of GbML1, GbMYB25 and GbMYB2. (A) GbML1 is a weak activator while GbMYB25 is a strong activator. BD indicates pDEST32 vector; AD indicates pDEST22 vector. Each BD, BD-GbML1, BD-GbMYB25 and BD-GbMYB2 vector is co-transformed with AD vector into yeast strain AH109. The yeast clones grown on selective plates are presented. (B) C2 part of GbMYB25 confers the strong activation activity. (a) Diagram of the three parts of GbMYB25. MYB indicates the N terminal part of GbMYB25 containing the two MYB repeats (aa: 1-112); C1 indicates the domain predicted with similarity of other MYB proteins (aa: 113-170); C2 is the domain at the C terminus with low similarities to other proteins (aa: 171-309). (b) The yeast clones harboring AD vector and BD-MYB/BD-C1/BD-C2 /BD-GbMYB25 grown on selective plates are presented.

**Supplementary Figure 5.** Alignment of GbMYB25 with GhMYB25. The SNPs are indicated by arrows.

**Supplementary Figure 6.** Alignment of GbMYB2, GaMYB2 and GhMYB2. The SNPs are indicated by arrows.

**Supplementary Figure 7.** Alignment that uses to generate the phylogeny tree.

**Supplementary Table S1.** Primers and probes used in this research.

### Reference:

K. Higo, Y. Ugawa, M. Iwamoto and T. Korenaga (1999) Plant cis-acting regulatory DNA elements (PLACE) database. *Nucleic Acids Research* **27**: 297-300



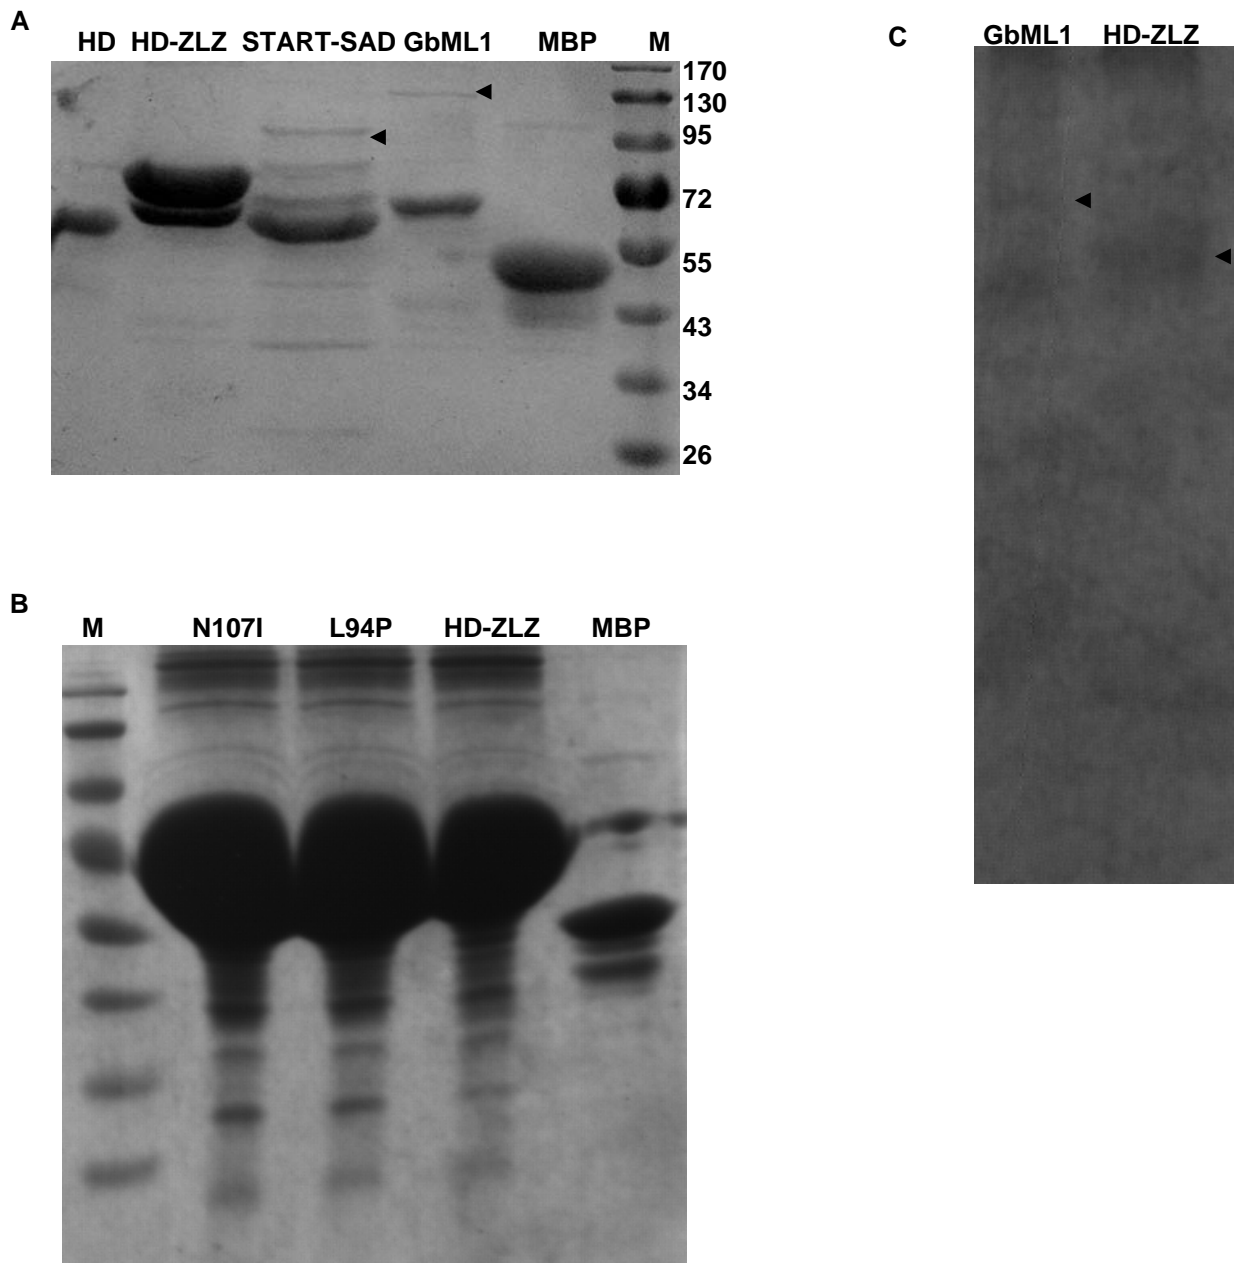

Supplementary figure 2

CTTGACAATTCTCTTCATTTTCCTCACCCCCCTTGGAACTTCAAACCCCTTTCTCTCTCTAGACTTTAACCCCTCTTCTCTCTCAAGGTAGGTCTCTGTCAA  
ACCAGTGACCCCAAACCTTTTAAAAACCACCCTCTTACCTCCTTTCAATTAATCTTTTTCAACAATGTTCAAAAGGGCTTTCTTTTGTTCCTATACGCCCTGTA  
AAAAGTCTCTACTCACGAACTATCTTTTTCTGGACCAGCTTGTATAGCACCCGATCCGTGTTCACTCCATTTGCCATTCTCTTTTCATATATTCGCTTA  
TAAAGCTTTGCTGAGAATCAAGAGAGAGTGCAAAAAGTGTGTAATCTTTGGTTTGTGGGGACTTCTATCAAAATCAACCTAAATACCACCAATATAGGAA  
AGCGGGGCCAAGAATCTAACAAGCAAGAGACTGATATGTGTAGCATGTATTGCTGCTGGTTAGGGTTTTATAGGTCAATGGCTATCTATGTCTCCCAACATG  
AGGTTTCTAGTGACCAACTTACCACTGCATTTAAGACAAGAAAAATAGTTGCCCTAAGCTCTTAGTCCCCTTCTCCAAATAATCCATAAGGTAATTTTCTTTCT  
CCTTTTTCCCAACTTTTGTGCCCCATTTTATTCTCCGAGGTTCTTTCACTTTTCCCATGGGAATAGATTAGGATAAGCTTTTGCATAATCCATCATTTAAT  
CTTCGAAGTATATGCTACCTTTAAATATAGTAGCAGTTGGTTATTAAGATATTCAAAGAAAAATCCTTCTCGATAAGCGAACTAGACCTTCTTTTTCTTTGAAA  
GAGAGATGGTATATGGTTTACAGCTCCATTGTTTATTGCTTTCAAATGTTTTACGATTCCATTGTCATGCACTGGTTTTGACTTTTTAACTTTGACTTACA  
TTTTGTGCTTTTGTACTGTTCTACAGTTTATTTAACCCCTTTTACCCTTTATTTTAGTTTGCTTGACTTGTGTATGTTCTCTCGGCAGAACCCAGAATATCCA  
TACCGTCGACATTCGAGCACTTTGTTAACATG

TGGTTAG

:MYBATRD22

TAAATGYA

:L1BOXATPDF1

ATG: Translation start codon RACE 5' end nucleotides are italic

Sequence used in EMSA is

GCATGTATTGCTGCTGGTTAGGGTTTTATAGGTCAATGGCTATCTATGTCTCCCAACATGAGGTTTCTAGTGACCAACTTACCACTGCATTTAAGACAAGAAA  
ATAGTTG

### Supplementary Figure 3

A

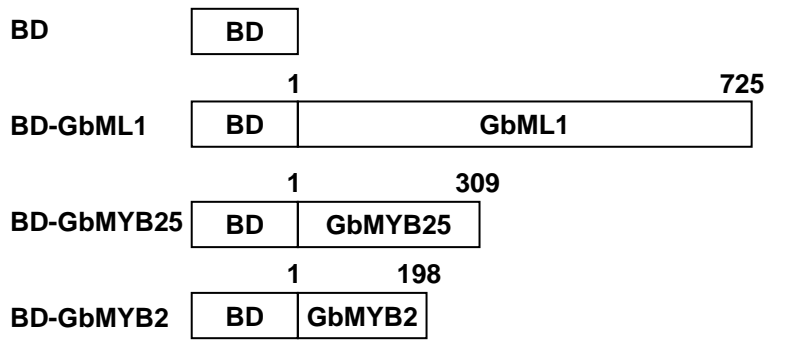

BD    BD-GbML1    BD-GbMYB25    BD-GbMYB2

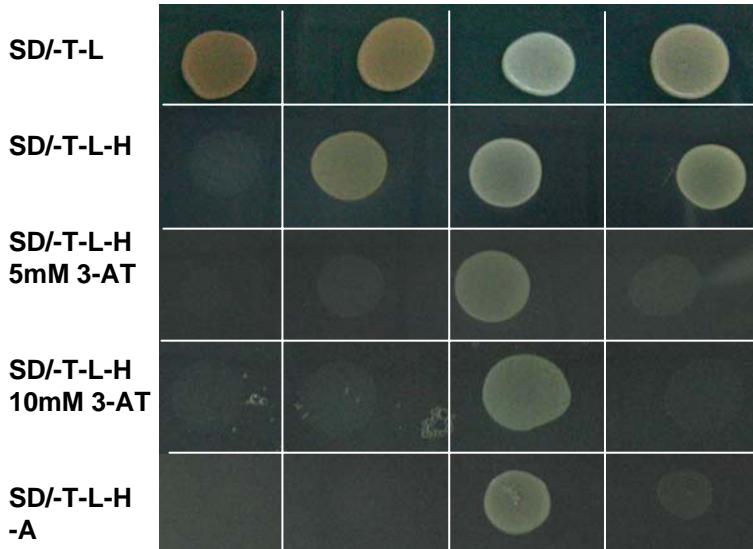

B

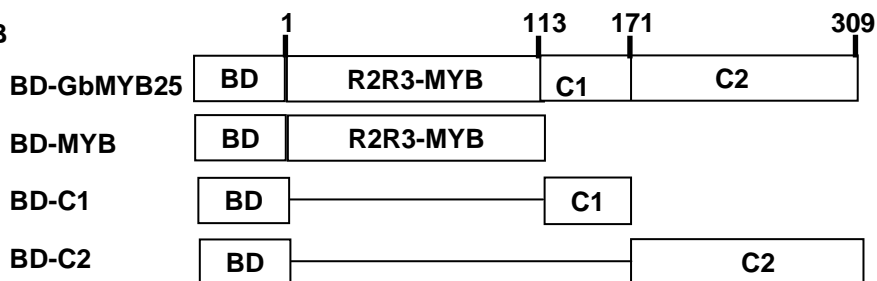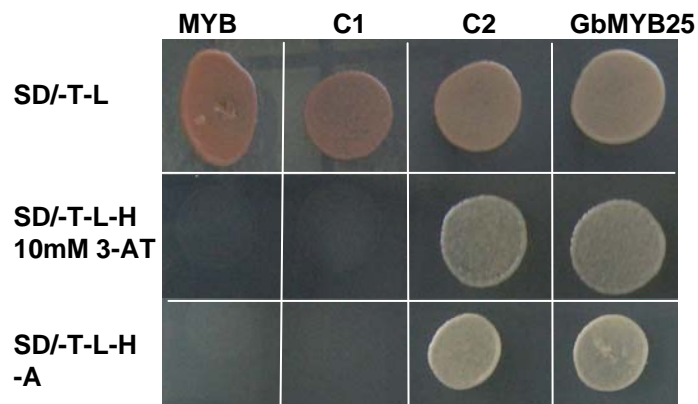

Supplementary Figure 4

|         |            |            |            |            |            |           |            |            |
|---------|------------|------------|------------|------------|------------|-----------|------------|------------|
|         | 10         | 20         | 30         | 40         | 50         | 60        | 70         | 80         |
| GbMYB25 | ATGGGGAGAT | CACCATGTTG | TGAAAAGGTA | GGGTTGAAGA | AAGGTCCATG | GACCCAGAA | GAAGATCAAA | AGCTCTTAGC |
| GhMYB25 | ATGGGGAGAT | CACCATGTTG | TGAAAAGGTA | GGGTTGAAGA | AAGGTCCATG | GACCCAGAA | GAAGATCAAA | AGCTCTTAGC |

  

|         |            |            |            |            |            |            |            |            |
|---------|------------|------------|------------|------------|------------|------------|------------|------------|
|         | 90         | 100        | 110        | 120        | 130        | 140        | 150        | 160        |
| GbMYB25 | TTACATTGAA | CAACATGGCC | ATGGAAGCTG | GCGTGCCTTG | CCTTTAAAAG | CTGGGCTTCA | AAGATGTGGA | AAGAGTTGCA |
| GhMYB25 | TTACATTGAA | CAACATGGCC | ATGGAAGCTG | GCGTGCCTTG | CCTTTAAAAG | CTGGGCTTCA | AAGATGTGGA | AAGAGTTGCA |

  

|         |            |            |            |             |             |            |            |            |
|---------|------------|------------|------------|-------------|-------------|------------|------------|------------|
|         | 170        | 180        | 190        | 200         | 210         | 220        | 230        | 240        |
| GbMYB25 | GACTGAGATG | GATTAACTAC | TTGAGACCTG | ATATCAAAAAG | AGGAAAAGTTC | AGTTTACAAG | AAGAACAGAC | CATTATTCAA |
| GhMYB25 | GACTGAGATG | GATTAACTAC | TTGAGACCTG | ATATCAAAAAG | AGGAAAAGTTC | AGTTTACAAG | AAGAACAGAC | CATTATTCAA |

  

|         |           |           |            |            |            |            |             |            |
|---------|-----------|-----------|------------|------------|------------|------------|-------------|------------|
|         | 250       | 260       | 270        | 280        | 290        | 300        | 310         | 320        |
| GbMYB25 | CTCCATGCC | TTCTTGAAA | CAGGTGGTCT | GCCATAGCTA | CTCATTGGCC | GAAAAGAACA | GACAAATGAGA | TCAAGAACTA |
| GhMYB25 | CTCCATGCC | TTCTTGAAA | CAGGTGGTCT | GCCATAGCTA | CTCATTGGCC | GAAAAGAACA | GACAAATGAGA | TCAAGAACTA |

  

|         |            |            |            |             |            |            |            |            |
|---------|------------|------------|------------|-------------|------------|------------|------------|------------|
|         | 330        | 340        | 350        | 360         | 370        | 380        | 390        | 400        |
| GbMYB25 | CTGGAACACA | CATCTAAAAG | AAAAGCTAAC | CAAAAATGGGG | ATCGATCCTG | TCACCCACAA | GCCTAAAACC | GATGCACTCG |
| GhMYB25 | CTGGAACACA | CATCTAAAAG | AAAAGCTAAC | CAAAAATGGGG | ATCGATCCTG | TCACCCACAA | GCCTAAAACC | GATGCACTCG |

  

|         |           |            |            |            |            |            |            |            |
|---------|-----------|------------|------------|------------|------------|------------|------------|------------|
|         | 410       | 420        | 430        | 440        | 450        | 460        | 470        | 480        |
| GbMYB25 | GTCCACCAC | TGGTAACCCT | AAAGATGCTG | CTAACCTTAG | TCACATGGCT | CAATGGGAGA | GTGCTCGTTT | AGAAGCTGAA |
| GhMYB25 | GTCCACCAC | TGGTAACCCT | AAAGATGCTG | CTAACCTTAG | TCACATGGCT | CAATGGGAGA | GTGCTCGTTT | AGAAGCTGAA |

  

|         |            |            |            |            |            |            |            |            |
|---------|------------|------------|------------|------------|------------|------------|------------|------------|
|         | 490        | 500        | 510        | 520        | 530        | 540        | 550        | 560        |
| GbMYB25 | GCTAGACTGG | TTCGTGAGTC | CAAGCTAGTT | CCCTCAAACC | CTCCTCAAAG | CAACCACTTC | ACTGCCGTTG | CGCCTTCGCC |
| GhMYB25 | GCTAGACTGG | TTCGTGAGTC | CAAGCTAGTT | CCCTCAAACC | CTCCTCAAAG | CAACCACTTC | ACTGCCGTTG | CGCCTTCGCC |

  

|         |            |            |            |           |           |            |           |            |
|---------|------------|------------|------------|-----------|-----------|------------|-----------|------------|
|         | 570        | 580        | 590        | 600       | 610       | 620        | 630       | 640        |
| GbMYB25 | GACTCCGGCA | ACTAGACCGC | AATGCCTCGA | CGTACTCAA | GCATGGCAA | GTGTCGTCTG | CGGGTTATT | ACTTTCAACA |
| GhMYB25 | GACTCCGGCA | ACTAGACCGC | AATGCCTCGA | CGTACTCAA | GCATGGCAA | GTGTCGTCTG | CGGGTTATT | ACTTTCAACA |

  

|         |            |            |            |            |            |            |            |            |
|---------|------------|------------|------------|------------|------------|------------|------------|------------|
|         | 650        | 660        | 670        | 680        | 690        | 700        | 710        | 720        |
| GbMYB25 | TGGACAATAA | CAACTTACAG | TCCCCTACGT | CAACGTTGAA | CTTCATGGAG | AACACCACAA | CATTGCCTAT | GTCATCATCA |
| GhMYB25 | TGGACAATAA | CAACTTACAG | TCCCCTACGT | CAACGTTGAA | CTTCATGGAG | AACACCACAA | CATTGCCTAT | GTCATCATCA |

  

|         |            |            |             |           |            |            |            |            |
|---------|------------|------------|-------------|-----------|------------|------------|------------|------------|
|         | 730        | 740        | 750         | 760       | 770        | 780        | 790        | 800        |
| GbMYB25 | TCGTCTGTTA | ATGGAATGTT | TAAATGAAAAC | TTTGTTGGA | ACTCATCGAT | TAATCCATGT | GAAAAGTGGG | ATATTTTGAA |
| GhMYB25 | TCGTCTGTTA | ATGGAATGTT | TAAATGAAAAC | TTTGTTGGA | ACTCATCGAT | TAATCCATGT | GAAAAGTGGG | ATATTTTGAA |

  

|         |            |            |            |            |            |            |            |            |
|---------|------------|------------|------------|------------|------------|------------|------------|------------|
|         | 810        | 820        | 830        | 840        | 850        | 860        | 870        | 880        |
| GbMYB25 | AGTTGAATAT | GGCAGTGATC | AAATTCCAGA | GTTAAAAGGA | AGATTGGATC | ATCCAATGGA | ATTGCATGAA | ATGGACTGTI |
| GhMYB25 | AGTTGAATAT | GGCAGTGATC | AAATTCCAGA | GTTAAAAGGA | AGATTGGATC | ATCCAATGGA | ATTGCATGAA | ATGGACTGTI |

  

|         |            |            |            |            |            |
|---------|------------|------------|------------|------------|------------|
|         | 890        | 900        | 910        | 920        | 930        |
| GbMYB25 | CTTCAGAGGG | TACATGGTTT | CAAAGATTGT | TTGGATTTAA | TGGTTTGTGA |
| GhMYB25 | CTTCAGAGGG | TACATGGTTT | CAAAGATTGT | TTGGATTTAA | TGGTTTGTGA |

Supplementary Figure 5

|        |            |            |            |              |            |             |            |            |
|--------|------------|------------|------------|--------------|------------|-------------|------------|------------|
|        | 10         | 20         | 30         | 40           | 50         | 60          | 70         | 80         |
| GaMYB2 | ATGGCTCCAA | AGAAGGATGG | AGTGAGCAAA | AGGGTTTTTA   | ACAAAGGTTC | TGGACAGCT   | GAGGAAGATA | GAAGATTGGC |
| GbMYB2 | ATGGCTCCAA | AGAAGGCTGG | AGTGAGCAAA | AGGGTTTTTA   | ACAAAGGTTC | ATGGACAGCT  | GAGGAAGATA | GAAGATTGGC |
| GhMYB2 | ATGGCTCCAA | AGAAGGCTGG | AGTGAGCAAA | AGGGTTTTTA   | ACAAAGGTTC | ATGGACAGCT  | GAGGAAGATA | GAAGATTGGC |
|        | 90         | 100        | 110        | 120          | 130        | 140         | 150        | 160        |
| GaMYB2 | TAAATATATT | GAGATTCATG | GGCAAAGAG  | ATGGA AAAACA | ATCGCCATTA | AATCAGGTTT  | GAATCGATGC | GGCAAGAGTT |
| GbMYB2 | TAAATATATT | GAGATTCATG | GTGCAAAGAG | ATGGA AAAACA | ATCGCCATTA | AATCAGGTTT  | GAATCGATGC | GGCAAGAGTT |
| GhMYB2 | TAAATATATT | GAGATTCATG | GTGCAAAGAG | ATGGA AAAACA | ATCGCCATTA | AATCAGGTTT  | GAATCGATGC | GGCAAGAGTT |
|        | 170        | 180        | 190        | 200          | 210        | 220         | 230        | 240        |
| GaMYB2 | GCAGGTTGAG | ATGGTTGAAC | TACTTGAGAC | CTAACATTAA   | GAGAGGCAAC | ATATCAGATG  | AAGAAGAGGA | CTTAATTATT |
| GbMYB2 | GCAGGTTGAG | ATGGTTGAAC | TACTTGAGAC | CTAACATTAA   | GAGAGGCAAC | ATATCAGATG  | AAGAAGAGGA | CTTAATTATT |
| GhMYB2 | GCAGGTTGAG | ATGGTTGAAC | TACTTGAGAC | CTAACATTAA   | GAGAGGCAAC | ATATCAGATG  | AAGAAGAGGA | CTTAATTATT |
|        | 250        | 260        | 270        | 280          | 290        | 300         | 310        | 320        |
| GaMYB2 | AGGCTTCATA | AACTGCTGGG | GAACAGGTGG | TCTTTGATTG   | CTGGGAGACT | TCCAGGGCGA  | ACAGACAATG | AAATTAAGAA |
| GbMYB2 | AGGCTTCATA | AACTGCTGGG | GAACAGGTGG | TCTTTGATTG   | CTGGGAGACT | TCCAGGGCGA  | ACAGACAATG | AAATTAAGAA |
| GhMYB2 | AGGCTTCATA | AACTGCTGGG | GAACAGGTGG | TCTTTGATTG   | CTGGGAGACT | TCCAGGGCGA  | ACAGACAATG | AAATTAAGAA |
|        | 330        | 340        | 350        | 360          | 370        | 380         | 390        | 400        |
| GaMYB2 | CTACTGGAAT | TCCCATTTGA | GCAAGAAAAT | AATAAACCAT   | GATGTCAGAA | CAGAACA AAC | TTCTCTCTCG | GAACAAATTG |
| GbMYB2 | CTACTGGAAT | TCCCATTTGA | GCAAGAAAAT | AATAAACCAT   | GATGTCAGAA | CAGAACA AAC | TTCTCTCTCG | GAACAAATTG |
| GhMYB2 | CTACTGGAAT | TCCCATTTGA | GCAAGAAAAT | AATAAACCAT   | GATGTCAGAA | CAGAACA AAC | TTCTCTCTCG | GAACAAATTG |
|        | 410        | 420        | 430        | 440          | 450        | 460         | 470        | 480        |
| GaMYB2 | TGCCTCACAA | AGCATGGGAA | ACTGTCCAGA | TGGAAGAAGA   | AGAGGTAGTA | AAAGGAAGTG  | ATGAAATTGA | AAACTCTGAA |
| GbMYB2 | TGCCTCACAA | AGCATGGGAA | ACTGTCCAGA | TGGAAGAAGA   | AGAGGTAGTA | AAAGGAAGTG  | ATGAAATTGA | AAACTCTGAA |
| GhMYB2 | TGCCTCACAA | AGCATGGGAA | ACTGTCCAGA | TGGAAGAAGA   | AGAGGTAGTA | AAAGGAAGTG  | ATGAAATTGA | AAACTCTGAA |
|        | 490        | 500        | 510        | 520          | 530        | 540         | 550        | 560        |
| GaMYB2 | TTCAGCATTG | ATGTGGACGA | ATTCTTTGAC | TTCACAACGG   | AAGGTTGCTT | TAGTTTGGAT  | TGGGTGAATA | AGTTCCTTGA |
| GbMYB2 | TTCAGCATTG | ATGTGGACGA | ATTCTTTGAC | TTCACAACGG   | AAGGTTGCTT | TAGTTTGGAT  | TGGGTGAATA | AGTTCCTTGA |
| GhMYB2 | TTCAGCATTG | ATGTGGACGA | ATTCTTTGAC | TTCACAACGG   | AAGGTTGCTT | TAGTTTGGAT  | TGGGTGAATA | AGTTCCTTGA |
|        | 570        | 580        | 590        |              |            |             |            |            |
| GaMYB2 | ACTTGATGAT | CAACAGGATC | CATTAGCAAT | GGTATAA      |            |             |            |            |
| GbMYB2 | ACTTGATGAT | CAACAGGATC | CATTAGCAAT | GGTATAA      |            |             |            |            |
| GhMYB2 | ACTTGATGAT | CAACAGGATC | CATTAGCAAT | GGTATAA      |            |             |            |            |

Supplementary Figure 6

| 10          | 20          | 30          | 40          | 50          | 60          | 70           | 80           |
|-------------|-------------|-------------|-------------|-------------|-------------|--------------|--------------|
| ..... ..... | ..... ..... | ..... ..... | ..... ..... | ..... ..... | ..... ..... | ..... .....  | ..... .....  |
| MNFNGFLDDG  | AG----ASKL  | LSDAPYNNHF  | SFSAVDTMLG  | SAAIAP----  | ---SQSLP--  | -FSSGSLSLG   | LQTN-----    |
| MNFGSLFDNT  | PGGGSTGARL  | LSGLSYGNHT  | --AATNVLPG  | GAMAQAAAAA  | SLFSPPLTKS  | VYASSGLSLA   | LEQPERGTNR   |
| -----       | -----       | -----       | -----       | -----       | -----       | -----        | -----        |
| -----       | ---METKDKKE | KGHMVLNSDN  | VFGS----VS  | SSPTTTIQNP  | NY-FTSFENP  | NFPYIFPKEE   | YEVMS-----   |
| -----       | ---MLTMGEGN | ---VMTSNN   | RFASPPQQPS  | SSSPGTIQNP  | NFNFIPIFN-- | SYSSIIIPKEE  | HGMMSSMMMM   |
| -----       | -----       | -----       | -----       | -----       | -----       | ---MNGQGDLD  | AVGN-----    |
| -----       | -----       | -----       | -----       | -----       | -----       | ---MNGDLEVD  | MSRG-----    |
| -----       | -----       | -----       | -----       | -----       | -----       | -----        | -----        |
| -----       | -----       | -----       | -----       | -----       | -----       | ---MFSPN     | LFES-PHMFD   |
| -----       | -----       | -----       | -----       | -----       | -----       | ---MSFVVGVGG | S-----       |
| -----       | -----       | -----       | -----       | -----       | -----       | ---MEFLG---  | -----        |
| -----       | -----       | -----       | -----       | -----       | -----       | ---MYHPN     | MFESHMMFMD   |
| -----       | -----       | -----       | -----       | -----       | -----       | ---MYHPN     | MFES-HMMFD   |
| -----       | ---MSMAVDMS | SKQPTKDFFS  | SPALSLSLAG  | IFRNASSGST  | NPEEDELGRR  | VVDEEDRTVE   | MSSE-----    |
| -----       | -----       | -----       | -----       | -----       | -----       | ---MFQPN     | MFDSHHHLLD   |
| -----       | -----       | ---MM       | I PARHMPP-- | MIVRNSAAAY  | GS-SSALS--  | ---LSQPN     | LLDSQQ-QLQ   |
| -----       | -----       | -----       | -----       | -----       | -----       | ---MFQAN     | MFEG-HMMFD   |
| -----       | -----       | -----       | -----       | -----       | -----       | -----        | ---MASK----- |
| -----       | -----       | -----       | -----       | -----       | -----       | -----        | ---MTPK----- |
| -----       | -----       | -----       | -----       | -----       | -----       | ---MFQPA     | LFES-HMMFD   |
| -----       | ---MPAGFI   | I PARHVPP-- | -LMARHTKAG  | YTTSSGLS--  | ---LAQPN    | MAEG---QFD   | MSQT-----    |
| -----       | ---M        | TPARRMPP--  | VIGRN-GVAY  | ESPSAQLP--  | ---LTQAD    | MLDSHHLQQA   | LQQQ-----    |
| -----       | ---MM       | I PARHMPS-- | MIGRN-GAAY  | GS-SSALS--  | ---LSQPN    | LLDNHQFQQA   | FQHQQQQHH-   |
| MSFGSLFDGG  | SG-----     | -----       | ---GGGG     | GGMQFP----  | ---FTTG     | FSSSPALSLG   | LDNAG-----   |
| -----       | ---M        | TPARRVPPAA  | MIGRN-GFAF  | GS-SSALS--  | ---LSQAD    | LLDSHQLQQA   | FQQQ-----    |
| -----       | ---MRLGGVT  | VQVPPNGNLG  | NLGRSFGELG  | GMPAGAMAPP  | RQIPPLAMPR  | PPPKHYSSPS   | LSLGPPTG--   |
| -----       | ---MRLGGVT  | VQVPPNGNLG  | NLGRSFGELG  | GMPTGAMAPP  | RQIPPLAMPR  | PPPKHYSSPS   | LSLGPPTG--   |
| -----       | -----       | -----       | ---MPT      | GVFSQP----  | RLVPSSIPKN  | MFNSPGLSLA   | LQQP-----    |
| -----       | -----       | -----       | -----       | -----       | -----       | ---MDCGSGGGG | L-----       |

| 90          | 100          | 110         | 120         | 130         | 140         | 150          | 160          |
|-------------|--------------|-------------|-------------|-------------|-------------|--------------|--------------|
| ..... ..... | ..... .....  | ..... ..... | ..... ..... | ..... ..... | ..... ..... | ..... .....  | ..... .....  |
| ---GE       | MSRNGEIMES   | NVSRKSS---  | ---RGED     | VEFSRSEDN-  | AEAVSG----  | -DDLD---T    | SDRPLKKKKR   |
| GEASMRNNNN  | VGGGGDTFDG   | SVNRRS---   | ---REEE     | HEFSRSGSDN- | VEGISG----  | -EDQD---A    | ADKPPRKK--R  |
| -----       | -YNHEDNNNE   | GFLRDDE---  | ---FDS      | PNTKSGSEN-  | QEGGS----   | ---GND-QD    | PL-HPNKKKKR  |
| -----       | ---ENNNNNN   | NNGGTDN---  | ---TN       | AGNDSGDQDF  | DSGNTSSG--  | ---NHGEGLGN  | NQAPRHHKKK   |
| -----       | ---KIESG     | -SGKST---   | ---G        | SGHDPVENTA  | IEQE-----   | -----        | ---PPAAKKKKR |
| GDG-----    | -TVEEMMENG   | SAGGSF----  | ---G        | SGSEQAEDPK  | FGNESDV---  | ---NELHDD    | EQPPPAAKKKR  |
| -----       | -----        | -----       | ---IPKP     | GEAEGDEIDM  | INDMSG----  | ---V         | NQDQGGRRMR   |
| -----       | ---DFNPSFFLG | KL-----     | ---KDDE     | FESRSLSDDS  | FDAMSGD---  | ---EDKQ---EQ | RPKKKKRKKTK  |
| -----       | -----        | -----       | ---MDN      | NGGSSGNEQ   | YTSGDAQQ--  | -----        | ---NGKR---T  |
| -----       | -----        | -----       | ---MDF      | TRDDNSDER   | ENDVDANT--  | -----        | ---NNRHEKKKG |
| -----       | -----        | -----       | ---MDS      | SHNDSSTD--  | EEGIDSN---  | -----        | ---NRRH---   |
| -----       | ---TSESELM   | GKIRDD---   | ---D        | YEIKSVNET-  | MDAPS-----  | ---GDD-QD    | PD-QRPKKKKR  |
| -----       | ---GSGSGGDGG | GSHHHD---   | ---G        | SETDRK---   | -----       | -----        | ---KKR       |
| -----       | -----        | DSQNHD---   | ---S        | SETEKKNK--  | -----       | -----        | ---KKKR      |
| -----       | ---NSENDLG   | ITGSHEE---  | ---D        | FETKSGAEVT  | MENPL-----  | ---EEELQD    | PNQRPNKKKR   |
| -----       | ---TSDNDLG   | ITGSRED---  | ---D        | FETKSGTEVT  | TENPS-----  | ---GEELQD    | PSQRPNKKKR   |
| -----       | ---NSGP      | TRSRSE---   | ---ED       | LEGEDHDDEE  | EEEEEDG---  | ---AAGN      | KGTNKRKKKK   |
| -----       | ---TPESEMG   | -KIRDE---   | ---E        | FESKSGTEN-  | MDAPS-----  | ---GDD-QD    | PN-QRPKKKKR  |
| ---LLDQIP   | ATAES---G    | DNMGRSGGGR  | GSDPLMGGDE  | FESKSGSEN-  | VDGV-----   | ---SVDDQD    | PNQRPSSKKKR  |
| -----       | ---SSENDSS   | -KLKDD---   | ---D        | YETKSGTET-  | MEAQs-----  | ---GDD-QD    | PSEQHPKKKKR  |
| -----       | ---SSENDLS   | -KLKDD---   | ---D        | YETKSGTET-  | MEAPS-----  | ---GDD-QD    | PSGQRPKKKKR  |
| -----       | ---SSENELG   | -NLKDDDY--  | ---D        | HETKSGTET-  | TEAPS-----  | ---GDD-QD    | PN-QRPKKKKR  |
| -----       | ---ADSEI     | AKIRDE---   | ---E        | FESKSGSDN-  | VEGAS-----  | ---GEDQD     | GERRP-RKKR   |
| ---YFDQIP   | VTTTAAADSG   | DNMLHG---   | RADAGGLVDE  | FESKSGSEN-  | VDGAGDG---  | ---LSGDDQD   | PNQRP-RKKR   |
| ---LLDQIP   | ATAES---G    | DNMIRS---R  | ASDP-LGGDE  | FESKSGSEN-  | VDGV-----   | ---SVDDQD    | PNQRP-RKKR   |
| ---GGMVGRM  | LPVGGAPADG   | GMARDA---   | ---ADAE     | NDSRSGSDH-  | LDAMSAGAGA  | -EDED--DAE   | PGNPRKKKKR   |



```

----LFDQIP TTTVD-DSS DNLIHG---- RSDT--LVDE FESKSCSEN- PDGT-SG--- ---DDGLEED PNQRPNKKKR
----LDGQRE VSQTADNEQQ QKNKEE---- ----- YESRSGSDN- MEGGS----- -----GDED PDNNHPRKKR
----LDGQRE VSQTADNEQQ QKNKEE---- ----- YESRSGSDN- MEGGS----- -----GDED PDNNHPRKKR
---NIDNQGD ETRLGENFEG SIGRRS---- -----REEE HESRSGSDN- MDGSSG---- -DDHPTTAA GDKPPRKR-R
-----G-----ASG SGGDHD---- -----S SDLSRR----- -----KKP

```

| 170        | 180         | 190        | 200         | 210        | 220        | 230        | 240        |
|------------|-------------|------------|-------------|------------|------------|------------|------------|
| .... ....  | .... ....   | .... ....  | .... ....   | .... ....  | .... ....  | .... ....  | .... ....  |
| YHRHTPKQIQ | DLESVFKECA  | HPDEKQRLDL | SRRLNLDPRO  | VKFWFQNRRT | QMKTOIERHE | NALLRQENDK | LRAENMSVRE |
| YHRHTPQQIQ | ELBSMFKECP  | HPDEKQRLBL | SKRLCLETRQ  | VKFWFQNRRT | QMKTOIERHE | NALLRQENDK | LRAENMSIRE |
| YHRHTQLQIQ | EMBAFFKECP  | HPDDKQRKQL | SRELNLLEPLQ | VKFWFQNKRT | QMKNHHERHE | NSHLRAENEK | LRNDNLRYRE |
| YHRHTASQIQ | EMBAFFKECP  | HPDDKQRYDL | SAQLGLDPVQ  | IKFWFQNKRT | QNKNOQERFE | NSBLRNLNNH | LRSENQRLRE |
| YHRHTNRQIQ | EMBALFKENA  | HPDTKTRLRL | SKKLGLEPLQ  | VKFWFQNKRT | QIKAQQSRSD | NAKLKAENET | LKTESQNIQS |
| YHRHTNRQIQ | EMBALFKENP  | HPDDKQRKRL | SAELGLKPRO  | VKFWFQNRRT | QMKAOQDRNE | NVMLRAENDN | LKSENCHLOA |
| THRHTAYQIQ | ELBNFYMENP  | HPTEEQRVEL | GORLNMGVNQ  | VKNWFQNKRN | LEKINNDHLE | NVTLREEHDR | LATQDQLRS  |
| YHRHTSYQIQ | ELBSVFKECP  | HPNEKQRLBL | GKKLTLLESQ  | IKFWFQNRRT | QMKTOIERHE | NVILKQENEK | LRLENSFLKE |
| CHRHTPQQIQ | RLEAYFKECP  | HPDERQRNQL | CRELKLEPQ   | IKFWFQNKRT | QSKTQEDRST | NVLLRGENET | LQSDNEAMLQ |
| YHRHTNEQIH | RLEBYFKECP  | HPDEFQRRLI | GEELNLEKPK  | IKFWFQNKRT | QAKSHNEKAD | NAALRAENEK | LRRENESMED |
| ---HSHNQVQ | RLEBAFFHECP | HPDQSQRQL  | GNELNLEKPK  | IKFWFQNRRT | QARLHNEKAD | NIALRVENMK | LRCVNEAMEK |
| YHRHTQRQIQ | EMBAFFKECP  | HPDDKQRKEL | GRELGLEPLQ  | VKFWFQNKRT | QMKAOHERHE | NAILKAENEK | LRAENDRYKE |
| YHRHTAQQIQ | RLESSEFKECP | HPDEKQRNQL | SRELGLAPRO  | IKFWFQNRRT | QIKAOHERAD | NSALKAENDK | LRGENIAIRE |
| FHRHTPHQIQ | RLEBSTEFECC | HPDEKQRNQL | SRELGLAPRO  | IKFWFQNRRT | QIKAOHERAD | NALKAENEK  | LRGENIAIRE |
| YHRHTQRQIQ | ELBSVFKECP  | HPDDKQRKEL | SRELSLEPLQ  | VKFWFQNKRT | QMKAOHERHE | NQILKSENDK | LRAENNRYKD |
| YHRHTQRQIQ | ELBSVFKECP  | HPDDKQRKEL | SKDLNLEPLQ  | VKFWFQNKRT | QMKAOHERHE | NQILKSDMDK | LRAENNRYKE |
| YHRHTTDQIR | HMBALFKETP  | HPDEKQRQQL | SRELGLAPRO  | VKFWFQNRRT | QIKAOHERHE | NSLLKAELEK | LRSENKAMRE |
| YHRHTQHQIQ | EMBAFFKECP  | HPDDKQRKEL | SRELGLEPLQ  | VKFWFQNKRT | QMKAOHERHE | NSNLRAENEK | LRAENIRYKE |
| YHRHTQHQIQ | EMBAFFKECP  | HPDDKQRKEL | SRELGLEPLQ  | VKFWFQNKRT | QMKNOHERHE | NSQLRAENEK | LRAENMRYKE |
| YHRHTQRQIQ | DMBAFFKECP  | HPDDKQRKEL | SRELGLEPLQ  | VKFWFQNKRT | QMKAOHERSE | NSILKAENER | LRVENNRYKE |
| YHRHTQRQIQ | EMBAFFQECF  | HPDDKQRKEL | SRELGLEPLQ  | VKFWFQNKRT | QMKAOHERSE | NSILKAENEK | LRMENNRYKE |
| YHRHTQRQIQ | EMBAFFKECP  | HPDDKQRKEL | SRELGLEPLQ  | VKFWFQNKRT | QMKAOHERQE | NSILKAENEK | LRAENNRYKE |
| YHRHTQHQIQ | EMBMFFKECP  | HPDDKQRKEL | SRELGLEPLQ  | VKFWFQNKRT | QMKTOHERHE | NTQLRSENEK | LRSENMRYKE |
| YHRHTQHQIQ | EMBAFFKECP  | HPDDKQRKEL | SRELGLEPLQ  | VKFWFQNKRT | QMKNOHERHE | NAQLRAENDK | LRAENMRYKE |
| YHRHTQHQIQ | EMBAFFKECP  | HPDDKQRKEL | SRELGLEPLQ  | VKFWFQNKRT | QMKNOHERHE | NSQLRSDNEK | LRAENMRYKE |
| YHRHTPQQIQ | ELBALFKKECP | HPDEKQRDEL | SKRLGLDPRO  | VKFWFQNRRT | QMKTOIERHE | NALLRQENDK | LRAENMAIRE |
| YHRHTQHQIQ | EMBAFFKECP  | HPDDKQRKEL | SRELGLEPLQ  | VKFWFQNKRT | QMKNOHERHE | NAQLRAENDK | LRAENMRYKE |
| YHRHTPRQIQ | EMBMFFKECP  | HPDDKQRQQL | SRELGLEPLQ  | VKFWFQNRRT | QMKAOHERAE | NSMLRAENEK | LRSENLIMRE |
| YHRHTPRQIQ | EMBMFFKECP  | HPDDKQRQQL | SKDLGLEPRO  | VKFWFQNRRT | QMKAOHERAE | NSMLRAENEK | VRSENLIMRE |
| YHRHTPQQIQ | ELBALFKKECP | HPDEKQRLEL | SKRLCLETRQ  | VKFWFQNRRT | QMKTOIERHE | NSLLRQENDK | LRAENMSIRD |
| YHRHTAHQIQ | RLESMFKECP  | HPDEKQRLOL | SRELGLAPRO  | IKFWFQNRRT | QMKAOHERAD | NSALRAENDK | LRGENIAIRE |

| 250        | 260         | 270        | 280         | 290        | 300        | 310         | 320         |
|------------|-------------|------------|-------------|------------|------------|-------------|-------------|
| .... ....  | .... ....   | .... ....  | .... ....   | .... ....  | .... ....  | .... ....   | .... ....   |
| AMRNP--MCG | NCGGPAVIGE  | IS-MEEQHLR | IENSRLKDEL  | DRVCAITGKF | LGR-----   | -----SNGS-  | -----HHIP   |
| AMRNP--ICT | NCGGPAMLGD  | VS-LEEHHLR | IENARLKDEL  | DRVCNLTGKF | LGH-----   | -----HHN--  | -----HHY    |
| ALANA--SCP | NCGGPTAIGE  | MS-FDEHQLR | IENARLREBI  | DRISATAAKY | VGKPLVS--- | --NYPLMSP-  | -----PPLP   |
| AIHQ--LCP  | KCGGQTAIGE  | MT-FEEHHLR | ILNARLTBEI  | QQLSVTAEKI | SRLTGIP--- | VRSHPRVS--  | -----PPNP   |
| NFQCL--FCS | TCG-----    | -----HNLR  | IENARLRQEL  | DRLRSIVSMR | NPSPSQ---  | -----EITP-  | -----       |
| ELRCL--SCE | SCGGFTVLGD  | IP-F--NEIH | IENCLRREBI  | DRLCCIASRY | TGRPMQ---- | --SMPPSQPL  | INPSPMLPHH  |
| AMLR--LCN  | ICGKATNCGD  | TE-YEVQKLM | AENANLEREI  | DQFNRSYLSH | PKQ-----   | -----       | -----RMV    |
| SMRGS--LCI | DCGGAVIPGE  | VS-FEQHQLR | IENAKLKEBI  | DRICATANRF | IGG-----   | -----       | -----       |
| ALKSV--LCP | ACGGPFPGRE  | ERGHNLQKLR | FENARLKDHR  | DRISNFVDQH | KPNEPTV--E | DSLAYVP---  | -----SLDR   |
| ALNNV--VCP | PCGGRGPGRE  | DQLRHLQKLR | AQNAYLKDEY  | ERVSNYLKQY | GGHSMHN--- | VEATPYLHGP  | SNHASTSKNR  |
| ALETV--LCP | PCGG--PHGKE | EQLCNLQKLR | TKNVILKTEY  | ERLSSYLTKH | GGYSIPS--- | VDALPDLHGP  | STYGSTSNNR  |
| ALSNA--TCP | SCGGPAALGE  | MS-FDEQHLR | IENARLREBI  | DRISGTAAKY | VGKPLS---  | --SLPHLS--  | -----SHLH   |
| ALKHA--ICP | NCGGFPVSED  | PY-FDEQKLR | IENAHLEBEI  | ERMSTASKY  | MGRPLS---- | --QLS----   | -----TLHPMH |
| AIKHA--ICP | SCGDSPVNED  | SY-FDEQKLR | IENAO LRDEL | ERVSSTAAFE | LGRPLS---- | --HLPP----  | -----LLNPMH |
| ALSNA--TCP | NCGGPAALGE  | MS-FDEQHLR | IENARLREBI  | DRISATAAKY | VGKPLMANS- | --SSFPQLSSS | -----HHIP   |
| ALSNA--TCP | NCGGPAALGE  | MS-FDEQHLR | IENARLREBI  | DRISATAAKY | VGKPLG---- | --SSFAPLA-- | -----IHAP   |
| SFSKANSSCP | NCGGFP----  | -----DDLH  | IENSKLKAEI  | DKLRAALGRT | PYPLQAS--- | -----CSDDQ- | -----EHR    |
| ALSNA--TCP | HCGGPASIGE  | MS-FDEQHLR | IENARLRDEI  | DRISGTAAKY | VGKPLV---- | --SYPHLS--  | -----THTS   |
| ALSSA--SCP | NCGGPAALGE  | MS-FDEHHLR | VENARLREBI  | DRISATAAKY | VGKPLMVSFP | VLSSPPLAGAR | -----P----  |
| ALRNA--SCP | NCGGPAALGE  | MS-FDEQHLR | IENVRLREBI  | DRISGTAAKY | VGKPLS---- | --SLSNLS--  | -----PHLP   |

|            |            |             |            |            |            |            |             |
|------------|------------|-------------|------------|------------|------------|------------|-------------|
| ALSSA--SCP | NCGGPAALGE | MS-FDEQHLLR | TENARLRREI | DRISGTAAKY | VGKPLS---- | --SLSNLS-- | -----HHL    |
| ALSNA--SCP | NCGGPATLGE | IS-FDEQHLLR | TENARLRREI | DRLSGTAAKY | IGKPLS---- | --SLSHLS-- | -----SHLP   |
| ALNNA--SCP | NCGGPAALGE | MS-FDEQQLR  | MENARLRREI | DRISGTAAKY | VGKPLS---- | -FGPSPLS-- | -----SIP    |
| ALSSA--SCP | NCGGPAALGE | MS-FDEHHLR  | VENARLRDEI | DRISGTAAKH | VGKPPIVSFS | VLSSPLAVAA | -----A      |
| ALSSA--SCP | NCGGPAALGE | MS-FDEHHLR  | TENARLRREI | DRISATAAKY | VGKP-MVFPF | VLSNPMAAAA | -----SR--   |
| AMRSP--MCP | SCGSPAMLGE | VS-LEEQHLC  | TENARLKDEL | NRVYALATKF | LKMPVLSG   | PMLQPNLS-- | -----LPMP   |
| ALGTA--SCP | SCGGAALGE  | MS-FDEHHLR  | TENARLRDEI | DRISGTAAKH | VGKP-MVSFP | VLSSPLAAAA | -----AAAA   |
| ALKNP--QCP | HCGGPATVGE | MT-FDEQQLR  | TENVRLKEEL | DRVSALAACY | LGRPIT---- | --PMAPLA-- | -----LP     |
| ALKNP--QCP | HCGGPATVGE | MT-FDEQQLR  | TENVRLKEEL | DRVSALAACY | LGRPIT---- | --PMAPLA-- | -----LP     |
| AMRNP--ICT | NCGGPAIIGD | MS-LEEQLLR  | TENARLKDEL | DRVCALACKF | LGR-----   | ----PITG-- | -----PPLP   |
| ALKNV--ICP | SCGGPANED  | SY-FDDQKMR  | MENAQLKEEL | DRVSSIAAKY | IGRPLS---- | --QLP----- | -----PVQPVH |

|             |            |            |            |            |             |            |             |
|-------------|------------|------------|------------|------------|-------------|------------|-------------|
| 330         | 340        | 350        | 360        | 370        | 380         | 390        | 400         |
| .... ....   | .... ....  | .... ....  | .... ....  | .... ....  | .... ....   | .... ....  | .... ....   |
| DSALVLDGVG  | GSGGC---N  | VGGGFTLSSP | LLPQASPRFE | ISNGTGSGLV | ATVNRQQPVS  | VSDFDQRSRY | LDLALAAAMDE |
| NSSLFLAVGT  | N-----N    | NGGHFAFPP- | -----      | -DFGGGGGCL | PPQ-QQSTV   | INGIDQKSVL | DELALTAMDE  |
| PRPLFLAMGN  | -----      | --IGGEAYGN | -----      | -----NPN   | DLLKS---IT  | APTESDKPVI | IDLVAAMEE   |
| PPNFEFGMGS  | KGN---V    | GNHSRETTGP | -----      | -----      | -----       | -ADANTKPII | MELAFGAMEE  |
| -----       | -----      | -----      | -----      | -----      | -----       | ETNKNNDNM  | LIABEEKPID  |
| QPSLELDMSV  | YAGN--FPEQ | SCTDMMMLP- | -----P     | QDTACFFPDQ | TANNNNNNNM  | LLADEEKVIA | MELAVSCVQE  |
| STSEQAP---  | -----S     | SSS-----   | -----      | ---NPGINAT | PVLDFSGGTR  | TSEK-ETSIF | LNLAITALRE  |
| SISLEQP---  | -----S     | NG-----    | -----      | ---GIGSQHL | PIG-----H   | CVSGGTSIMF | MELAMEAMDE  |
| -ISYGINNGN  | MYEPSSSYGP | PN-----    | -----      | -----      | ---FQIQPR   | PLAETDMSLL | SELTAASAVEE |
| PALYGTSSNR  | LPEPSSIFRG | PYTRGN---  | -----      | -MNTTAPPQP | RKPLEMQNFQ  | PLSQLEKIAM | LEBAEKAVSE  |
| PASYGSSSNH  | LPQSSLLRR  | PFTREL---- | -----      | -INTTLP--- | -KPVLLQHFQ  | QLSQLEKNRM | FELAKNAVAE  |
| SRSVLDGASN  | FGN-----Q  | SGFVGMEDRS | -----      | -----G     | DLLRS---VS  | GPTEADKPMI | VELAVAAMEE  |
| ISPLDLSMTS  | LTGCGPFGHG | PSLDFDLLP- | -----G     | SSMAVGPNN- | --NLQSQPNL  | AISDMDKPII | TGIALTAMEE  |
| VSPLLEL---- | -----FHTG  | PSLDFDLLP- | -----G     | SCSSMSVPP- | --SLPSQPNL  | VLSEMDKSLM | TNIAVTAMEE  |
| SRSLDLEVGN  | FGNNN--NSH | TGFVGMFSG  | -----      | -----S     | DILRS---VS  | IPSEADKPMI | VELAVAAMEE  |
| SRSLDLEVGN  | FGN---Q    | TGFVGEYGT  | -----      | -----G     | DILRS---VS  | IPSETDKPII | VELAVNAAMEE |
| LGSLDFYTG-  | -----      | -----      | -----      | -----      | -----       | -VFALEKSR  | DELAVRATLE  |
| SRSLDLGVGN  | FGA-----Q  | SGIVGDMYGG | -----      | -----G     | DLLRS---VS  | LPTEADKPMI | VELAVAAMEE  |
| -SPLDIGGGV  | GG---AAA   | YGAV-DMFGG | -----      | -----GVAV  | DLLRGAVPQS  | ---DADKPMI | VELAVTAMEE  |
| SRSLDLGVSN  | FGA-----Q  | SGFVGMFPGA | -----      | -----T     | DLLRS---VT  | GPTEADKSMI | VELAVAAMEE  |
| SRSLDLGVSN  | YGA-----H  | SGFVGMFPGA | -----      | -----T     | ALLGA---VT  | GPTEADKPMI | VELAVAAMEE  |
| SRSLDLGVSN  | FGT-----Q  | SGYVGEYGA  | -----      | -----T     | DFLRS---IT  | GPTEAEKPMI | VELAVAAMEE  |
| RSNLDLAVGS  | YG-----VQ  | PNIGDIYGS  | -----      | -----SSG   | EIGNR---SLV | GPTEAEKPMV | VELAVAAMEE  |
| RSPLDLAG--  | -----A     | YGVVTPGLDM | -----      | ---FGG-AG  | DLLRG--VHP  | --LDADKPMI | VELAVAAMDE  |
| -APLDLP---  | -----VAP   | YGVPGDMFGG | -----      | -----GGAG  | ELLRG--VQS  | ---EVDKPMI | VELAVAAMEE  |
| SSSLELAVGG  | LRGLG---S  | IPSLDEFAG- | -----G     | VSSPLGTVIT | PARATGSAPP  | PMVGVDRSML | DELALISAMDE |
| RSPLDLAG--  | -----A     | YGVQSAAGL  | G-----A    | DH-LFGAGAG | DLLRS--VSA  | GQLDADKPMI | VELAVAAMDE  |
| SSSLLDQVGG  | GSSFSGMHPA | PGNLDVVAGP | -----      | -----SVA   | DVATR---PG  | GLTEAEKPMV | VELAVTAMEE  |
| SSSLLDQVGG  | GSSFSGMHP  | PGNLDLVAGP | -----      | -----SVA   | DVATR---PG  | GLTEAEKPMV | VELAVTAMEE  |
| NSSLLELGVGT | NG-----T   | FGTMTATT-  | -----      | -TLPLGHDAL | PTM-VVPSNR  | PATTLDRSMF | DELALAAAMDE |
| ISSLDLFRMAS | FDGYG-VGAG | PSLDDLPLP- | -----G     | SSSSMP---- | --NLPPQP-V  | VISIDIKSLM | SDIAANAMEE  |

|             |            |            |             |            |            |            |            |
|-------------|------------|------------|-------------|------------|------------|------------|------------|
| 410         | 420        | 430        | 440         | 450        | 460        | 470        | 480        |
| .... ....   | .... ....  | .... ....  | .... ....   | .... ....  | .... ....  | .... ....  | .... ....  |
| LVKMAQTRFP  | LWVRSSDS-- | ----GFEVLN | QEYDTSFSE   | CV--GPKQDG | FVSEASKEAG | TVIIN-SLAL | VELTMDSERW |
| LVKLAQSEEP  | LWVKSLDG-- | ----ERDELN | QDEYMRTEF-  | ----STKPTG | LATEASRTSG | MVIIN-SLAL | VELTMDSNRW |
| LMRVQVDEP   | LWK-----   | ----SLVLD  | EEYARTFPR   | G--IGPRPAG | YRSEASRESA | VVIMN-HVNI | VELTMDVNQW |
| LLVMAQVAEP  | LWVG--GFNG | ----TSLALN | LDEYEKTEFT  | G--LGPRIGG | FRTEASRETA | LVAMC-PTGI | VELMLQENLW |
| IAKMCDINEP  | LWNNKRLD-- | ---NESVCLN | EEYKMKFLW   | PLMNDDDR-- | FRREASRANA | VIMIN-CITL | VKAFLDADKW |
| LTKMCDTEEP  | LWLKKSDDKI | G--GEILCLN | EEYMRLEPW   | PMENQNNKGD | FLREASKANA | VVIMN-SITL | VDAFLNADKW |
| LITLGEVDCP  | FWMIDPIVRS | ----KGVSKI | YEKYRSSENN  | ----VTKPPG | QIVEASRAKG | LVPMT-CVTL | VELTMDTGKW |
| LLKLALELETS | LWSSKSEK-  | -----      | ---GSMNHFP- | -----      | ----GSRETG | LVLIN-SLAL | VELTMDTNNK |
| LKRLFLAEQ   | FVVKSCIDET | -----YVID  | TESYERFSHA  | VKH---FSST | TAHVESSKAV | TVVHVEAINL | IQMFLDPEKW |
| VLSLIQMDDT  | MWKKSSIDDR | -----LVID  | PGLYEKYFTK  | -----TNT   | NGRPESSKDV | VVVQMDAGNL | IDIFLTAEKW |
| VMSLIQMEHS  | MWIKSTIDGR | -----AID   | PGNYKRYFTK  | NSHLKRSAL  | QSHHSSMEV  | VVVQMDARNL | VDMFLNTEKW |
| LIRMAQSGEP  | LWV---PGDN | ----STDVLN | EDEYLRTFPR  | G--IGPKPLG | LRSEASRESA | VVIMN-HVNL | VELTMDVNQW |
| LLRLLQTNEP  | LWTR-TDGCR | -----DILN  | LGSYENVFPR  | SSNRG-KNQN | FRVEASRSSG | IVFMN-AMAL | VDMFMDCVKW |
| LLRLLQTNEP  | LWIK-TDGCR | -----DVLN  | LENYENMETR  | SSTS GGKKN | LGMEASRSSG | VVFTN-AITL | VDMLMNSVKL |



|            |             |            |            |            |            |            |            |
|------------|-------------|------------|------------|------------|------------|------------|------------|
| LVRMAQTGDP | LWV---SSDN  | ----SVEILN | EEEYERTEPR | G--IGPKPIG | LRSEASREST | VVIMN-HINL | IEILMDVNQW |
| LVRMAQTGDP | LWL---STDN  | ----SVEILN | EEEYERTEPR | G--IGPKPLG | LRSEASRQSA | VVIMN-HINL | VEILMDVNQW |
| LQRMATSGEP | MWLRSVETGR  | -----EILN  | YDEYLKBEFQ | AQ-ASSFPGR | KTIEASRDAG | IVFMD-AHKL | AQSFMDVGGW |
| LIRMAQAGEP | LWI--PTSDN  | ----STEILS | EDEYLRTEPR | G--IGPKPLG | LKSEASRETA | VVIMN-HISL | VEILMDVNQW |
| LVRMAQLDEP | LWN-APGLDG  | ----SAETLN | EEEYAHMFPG | G--IGPKQYG | FKSEASRDSS | VVIMT-HANL | VEILMDVNQY |
| LMRIAQAGEP | LWI---QGEN  | ----NTEMLN | EEEYLRTEPR | G--IGPKPLG | MRSEASRESA | VVIMN-HVNL | VEILMDANQW |
| LMRMAQAGEP | LWI---QGEN  | ----NTEMLN | EEEYLRTEPR | G--IGPRPLG | MRSEASRESA | VVIMS-HVNL | VEILMDANQW |
| LMRMAQAGDP | LWV---PGEN  | S---TTEVLN | EEEYLRTEPR | G--IGPRPLG | LRSEASRESA | VVIMN-HVNL | VEILMDVNQW |
| LVRMAQLGEP | LWT--SHPED  | ----STDILN | EDEYLRTEPR | G--IGPRPYG | LKAEASRETA | VVIMN-AINL | VETLMDVNQW |
| LVQMAQLDEP | LWS---SSSEP | ----AAALLD | EEEYARTEPR | G--IGPKQYG | LKSEASRHGA | VVIMT-HSNL | VEILMDVNQF |
| LVRMAQLDEP | LWSVAPPLDA  | TAA-AMETLS | EEEYARTEPR | G--IGPKQYG | LRSEASRDSA | VVIMT-HANL | VEILMDANQY |
| LVKLAQVDEP | LWLPSLSGSP  | ----DKKILN | EEEYAHSEPR | SV-GAVKPVG | YVSEASRESG | LVIIIDNSLH | VEILMDVRRW |
| LLRMAPDAL  | LWGGGASAGA  | ----QQQ-LD | EEEYVRETPA | G--IGPRQYG | LRSEASRDSA | VVIMT-CDSL | IEILMDANRE |
| LVRMAQTEEP | LWVNMGEVVK  | -----EQLN  | YEEYMRQEP  | G--IGCPPPG | LKTEATRETA | LVMMN-GVNL | VETLMDATQW |
| LVRMAQAEPP | LWLSM-DSGK  | -----AQLN  | YDEYMRQEP  | G--IGMRPSG | LKBEATRETA | LVMMN-GVNL | VETLMDATQW |
| LVRMAQTDEP | LWIKNIEG--  | ----GREMLN | HDEYLRTEPR | CI--GLKPNG | FVTEASRETG | VVIIN-SLAL | VETLMDSNRW |
| LLRLLQTNPE | LWIKSTNDGK  | -----DALN  | LESYERTEPR | PNNTHFKSPN | IRVEASRDSG | VVIMN-GLAL | VDMFMDSNKW |

|             |            |            |            |             |            |            |             |
|-------------|------------|------------|------------|-------------|------------|------------|-------------|
| 490         | 500        | 510        | 520        | 530         | 540        | 550        | 560         |
| .... ....   | .... ....  | .... ....  | .... ....  | .... ....   | .... ....  | .... ....  | .... ....   |
| AEMFPMVSR   | TSTTEIISG  | -MGG-RNGAL | HLMHAELQVL | SPLVPVQVS   | FLRYCKQ-HA | EGVWAVVDVS | IDSIR-----  |
| TEMFPCNVAR  | ATITDVISGG | -MAGTINGAL | QLMNAELOVL | SPLVPVRNVN  | FLRYCKQ-HA | EGVWAVVDVS | IDPVR-----  |
| STIFAGMVS   | AMTLAVLSTG | -VAGNYNGAL | QVMSAEFQVP | SPLVPTRYEY  | FARYCKQ-QG | DGSWAVVDIS | LDSLQPN---  |
| STMFAGVGR   | ARTHEQIMAD | -AAGNFNGNL | QIMSAYQVL  | SPLVPTREYS  | FVRYCKQ-QG | EGLWAVVDIS | IDHLLPN---  |
| SEMFFPIVSS  | AKTAQIISG  | -ASG-PSGTL | LLMFAELQVV | SPLVPTRYEAY | FLRYVEQNAE | EGKWMVVDFF | IDRIKPF---A |
| SEMFCISIVAR | AKTVQIISG  | -VSG-ASGSL | LL-----VL  | SPLVPTRYEAY | FLRYVEQNAE | TGNWAVVDFF | IDSFHDQMQP  |
| VNVFAPIVPV  | ASTHKVLSG  | -SGGTKSGSL | QQIQAEFQVI | SPLVPKRKVT  | FLRYCKE-IR | QGLWVVDVT  | PTQNP-----  |
| AEMFECIVAV  | ASTLEVISNG | -SDGSRNGSI | LLMQAEFQVM | SPLVPIKQKK  | FLRYCKQ-HG | DGLWAVVDVS | YDINR-----  |
| KELFPTIVNK  | ANTIHVLSG  | LPIRGNCNVL | QVMWEQLHIL | SPLVPAREFM  | VVRCCQE-IE | KGIWVIADVS | HRAN-----   |
| ARLEPTIVNE  | AKTIHVLDL  | VDHRGKT-FS | RVVYEQLHIL | SPLVPAREFM  | ILRTCCQ-IE | DNVWMIADVS | CHLPNIE---  |
| ARLEPTIVTE  | AKTIHVLDL  | MDHPRQT-FS | RVVYEQLHIL | SPLVLPREFI  | ILRTCCQ-MK | EDLWVIADVS | CYLQNV----  |
| SSVFCGIVSR  | AMTLEALSTG | -VAGNYNGAL | QVMTAEFQVP | SPLVPTRYEY  | FVRYCKQ-HI | DGTWAVVDVS | LDNLRPN---  |
| TELEPSIIAA  | SKTLAVISSG | -MGGTHEGAL | HLLYEEMVVL | SPLVATREFC  | ELRYCQ-TE  | QGSWIVVNVS | YD-----LP   |
| TELEPSIVAS  | SKTLAVISSG | -LRGNHGDAL | HLMIEELOVL | SPLVATREFC  | VLRYCQ-IE  | HGTWAVVNVS | YE-----FP   |
| SSVFCGIVSR  | AMTLEVLSTG | -VAGNYNGAL | QVMTAEFQVP | SPLVPTRYEY  | FVRYCKQ-HS | DGTWAVVDVS | LDSLSPS---  |
| SCVFSGIVSR  | AMTLEVLSTG | -VAGNYNGAL | QVMTAEFQVP | SPLVPTRYEY  | FVRYCKQ-HS | DGSWAVVDVS | LDSLSPS---  |
| KETBACLISK  | AATVDVIRQG | EGPSRIDGAI | QLMFGELQVL | TPVVPTRYEY  | FVRSRQ-LS  | PEKWAVVDVS | VSVEDSN---  |
| SSVFSGIVSR  | AMTLEVLSTG | -VAGNYNGAL | QVMTAEFQVP | SPLVPTRYEY  | FVRYCKH-HP | DGTWAVVDVS | LDNLRSG---  |
| ATVFSIVSR   | AMTLEVLSTG | -VAGNYNGAL | QVMSVEFQVP | SPLVPTRYEY  | FVRYCKQ-NA | DGSWAVVDVS | LDSLSPS---  |
| STIFCGIVSR  | AMTLEVLSTG | -VAGNYNGAL | QVMTAEFQVP | SPLVPTRYEY  | FVRYCKQ-HT | DGTWAVVDVS | LDSLSPS---  |
| STIFCGIVSR  | AMTLEVLSTG | -VAGNYNGAL | QVMTAEFQVP | SPLVPTRYEY  | FVRYCKQ-HT | DGTWAVVDVS | LDSLSPS---  |
| STVFCGIVSR  | AMTLEILSTG | -VAGNYNGAL | QVMTAEFQVP | SPLVPTRYEY  | FVRYCKQ-HV | DGTWAVVDVS | LDNLRPN---  |
| SSMFBGIVSR  | PHTVDVFSG  | -VAGNYNGAL | QVMHAEFQVP | SPLVPTRYEY  | FVRYCKQ-HS | DSIWAVVDVS | LDSLSPS---  |
| ATVFSIVSR   | ASTHEVLSTG | -VAGNYNGAL | QVMSMEFQVP | SPLVPTRYEY  | FVRYCKN-NS | DGTWAVVDVS | LDSLSPS---  |
| AAVFSNIVSR  | AMTLEVLSTG | -VAGNYNGAL | QVMSVEFQVP | SPLVPTRYEY  | FVRYCKQ-NA | DGTWAVVDVS | LDSLSPS---  |
| SDMFSMIAK   | ATVLEEVTSG | -IAGSRNGAL | LLMKAELOVL | SPLVPTREVT  | FLRYCKQ-LA | EGAWAVVDVS | IDGLVRDHNS  |
| AAVFSIVSR   | ASTHEVLSTG | -VAGSYNGAL | QVMSMEFQVP | SPLVPTRYEY  | FVRYCKN-NP | DGTWAVVDVS | LDSLSPS---  |
| MDMFCIVSR   | ALTVDVLATG | -VTGNRNGAL | QLMYAELQVL | SPLVPTRYEY  | FLRYCKQ-HA | EGVWAVVDVS | VDSLSDN---  |
| MDMFCMVS    | ALTVDVLATG | -VTGNRNGAL | QLMYAELQVL | SPLVPTRYEY  | FLRYCKQ-HA | EGVWAVVDVS | VDSLSDN---  |
| AEMFHCMIAR  | TSTTDVISNG | -MGGTRNGAL | QLMNAELOVL | SPLVPTRYEVS | FLRYCKQ-HA | EGVWAVVDVS | VDTIK-----  |
| LELEPTIVSI  | AKTIEVISPG | -MLGTHRSL  | QLMYEELQVL | SPLVPTRYEY  | TLRYCQ-IE  | QGLWAVVNVS | YD-----LP   |

|            |            |            |            |            |            |            |             |
|------------|------------|------------|------------|------------|------------|------------|-------------|
| 570        | 580        | 590        | 600        | 610        | 620        | 630        | 640         |
| .... ....  | .... ....  | .... ....  | .... ....  | .... ....  | .... ....  | .... ....  | .... ....   |
| --EGSS--SS | CRRLPSCGLV | QDMANGYSKV | TWIEHTEYDE | --NHTRLYR  | PLLRGGLAFG | AHRWMAALQR | QCECLTILMS  |
| --ENSGGAPV | IRRLPSCGVV | QDVSNYSKV  | TWVEHAEYDE | --NQIHQLYR | PLLRSGLGFG | QRWLATLQR  | QCECLAILIS  |
| -----PPAR  | CRRRASGCLI | QELPNYSKV  | TWVEHVEVDD | --RGVHLYK  | HMVSTGHAFG | AKRWVAILDR | QCECLASVMA  |
| -----INLK  | CRRRPSGCLI | QEMHSGYSKV | TWVEHVEVDD | --AGSYIFE  | KLICTGQAFG | ANRWVGTLLR | QCECLISSILS |
| SAT---TTDQ | YRRKPSGCI  | QAMRNGYSQV | TWVEHVEVEE | K-HVQDEVVR | EFVESGVAFG | AERWLSVLKR | QCECLASLMA  |
| MNT---ITHE | YRRKPSGCI  | QDMPNYSQV  | KWVEHVEVDE | K-HVH-ETFA | EYVKSMAFG  | ANRWLDVLR  | QCECLASLMA  |
| ---TLLPYGC | SKRRLPSGLI | DDLNSYSQV  | TWIEQAEYNE | --SHIHQLYQ | PLTGYGIGLG | AKRWLATLQR | HCECLSTLSS  |
| GNENLKSYYG | SKMFPSCGCI | QDIGNGCSKV | TWIEHSEYEE | --SHTHSLYQ | PLSSSVGLG  | ATKWLATLQR | QCESFTMLLS  |

|            |             |             |            |             |             |            |            |             |
|------------|-------------|-------------|------------|-------------|-------------|------------|------------|-------------|
| ---        | FDGNAA      | CYKRPSGCLI  | QALPDAHSKV | MWIEHVEVDH  | -KLDTHKLYR  | DLLSGSGYGY | AKRWVITLER | MCERMALSS-  |
| ---        | FDLSFPI     | CTKRPSGVLI  | CALPHGFSKV | TWIEHVVVND  | NRVRPEKLYR  | DLLYGFGYGY | ARRWVITLER | TCERLIFSTS  |
| ---        | FESTAPI     | CTKRPSGVLI  | QALPHGRSKV | TWIEHVEVTD  | -KVVPHQLYR  | DLLYGFGYGY | ARRWTATLQR | MCERLSLYS-  |
| -----      | PMSK        | CRRRPSGCLI  | QELPNGYSKV | IWVEHVEVDD  | --RAVHNIYR  | PVVNSGLAFG | AKRWVATLDR | QCEERLASSMA |
| QFV---     | SHSQ        | SYRFPSGCLI  | QDMPNGYSKV | TWVEHIEETEE | K-ELVHELTYR | EIIHRGIAFG | ADRWVITLQR | MCERFASLSV  |
| QFI---     | SQSR        | SYRFPSGCLI  | QDMSNGYSKV | TWVEHGEFEE  | Q-EPITHEMFK | DIVHKGLAFG | AERWIATLQR | MCERFTNLLE  |
| -----      | PITR        | SRRRPSGCLI  | QELQNGYSKV | TWVEHIEVDD  | --RSVHNYMK  | PLVNTGLAFG | AKRWVATLDR | QCEERLASSMA |
| ---        | T--PILR     | TRRRPSGCLI  | QELPNGYSKV | TWIEHMEVDD  | --RSVHNYMK  | PLVQSGAFG  | AKRWVATLER | QCEERLASSMA |
| -TEKEASLLK | CRKLPSPGCLI | EDTSNGHSKV  | TWVEHLDVSA | --STVQPLFR  | SLVNTGLAFG  | ARHWVATLQL | HCERLVFFMA |             |
| -----      | PITR        | NRRRPSGCLI  | QELPNGYSKV | IWVEHVEVDD  | --RAVHNIYR  | PLVNSGLAFG | AKRWVATLDR | QCEERLASAMA |
| -----      | SVLK        | CRRRPSGCLI  | QEMPNGYSKV | TWVEHVEVDD  | --RSVHNIYK  | LLVNSGLAFG | PPRWVGTLDP | QCEELPSVMP  |
| -----      | LLSK        | CRRRPSGCLI  | QELPNGYSKV | VWVEHIEVDD  | --RSVQNIYR  | PLVNSGLAFG | AKRWVGTLDR | QCEERLASSMA |
| -----      | LMSK        | CRRRPSGCLI  | QELPNGYSKV | VWVEHIEVDD  | --RSVHNIYR  | PLVNSGLAFG | AKRWVGTLDR | QCEERLASSMA |
| -----      | PIAR        | SRRRLSGCVI  | QDLPNGYSKV | TWIEHIEVDD  | --RSVHSLYR  | PLVNSGLAFG | AKRWVAILDR | QCEERLASSMA |
| ---        | SS-SVIR     | CRRRPSGCLI  | QEMPNSYSKV | TWVEHVEADD  | --RAVHHIYR  | QLVNSGMAFG | AKRWIATLQR | QCEERLASVLA |
| -----      | PVQK        | CRRRPSGCLI  | QEMPNGYSKV | TWVEHVEVDD  | --SSVHNIYK  | PLVNSGLAFG | AKRWVGTLDR | QCEERLASAMA |
| -----      | PVLK        | CRRRPSGCLI  | QEMPNGYSKV | TWVEHVEVDD  | --RSVHNIYK  | LLVNSGLAFG | ARRWVGTLDR | QCEERLASVMA |
| GTASNAGNIR | CRRLPSPGCVI | QDTPNGYCKV  | TWVEYTEYDE | --ASVHQLYR  | PLVNSGLAFG  | ARRWLAMLQR | QCECLAILMS |             |
| -----      | PVIK        | CRRRPSGCLI  | QEMPNGYSKV | TWVEHVEVDD  | --RSVHNIYR  | PLVNSGLAFG | AKRWVGTLDR | QCEERLASAMA |
| ---        | PPPSLMR     | CRRRPSGVLI  | QDTPNGYAKV | TCVEHMEYDD  | --RAVHRMYR  | DLVNTGMAFG | AQRWLATLQR | QCEERLASLLA |
| ---        | PPPSLMR     | CRRRPSGVLI  | QDTPNGYAKV | TCVEHMEYDD  | --RAVHRMYR  | ELVNTGMAFG | AQRWLATLQR | QCEERLASLLA |
| --ESTT-FVT | CRRLPSPGCVI | QDMPNGYSKV  | IWAHAHAYDE | --SQVHQLYR  | PLVNSGLAFG  | AQRWVAALQR | QCECLAILMS |             |
| QFA---     | SQCR        | SHRLPSPGCLI | QDMPNGYSKV | TWLERVEIED  | K-TPHRLYR   | DLVHSGSAFG | ARRWLTTLQR | MCEWFACLRY  |

|             |            |             |             |             |             |            |             |
|-------------|------------|-------------|-------------|-------------|-------------|------------|-------------|
| 650         | 660        | 670         | 680         | 690         | 700         | 710        | 720         |
| .... ....   | .... ....  | .... ....   | .... ....   | .... ....   | .... ....   | .... ....  | .... ....   |
| STVSTSTNPS  | PINCN--GRK | SMLKLAQRMT  | DNFCGGVCAS  | SLOKWSKLN-  | -VGNVDEdVR  | IMTRKSVNPP | GEPPGIILNA  |
| SSVTSHDN-T  | SITPG--GRK | SMLKLAQRMT  | FNFCSGLSAP  | SVHNSKILT-  | -VGNVDEdVR  | VMTRKSVDDP | GEPPGIVLSA  |
| TNISSGEVGV  | ITNQE--GRR | SMLKLAERMV  | ISFCAGVSAS  | TAHTWTILS-  | --GTGAEDVR  | VMTRKSVDDP | GRPPGIVLSA  |
| TDFQSVDSGD  | HITLTNHGKM | SMLKIAERIA  | RTFFAGMTNA  | TGS--TIFS-  | --GVEGEDIR  | VMTRKSVNDP | GKPPGVIICA  |
| TNIT--DLG-  | VIPSVE-ARK | NLMKLSQRMV  | KTFCFLNINS  | HGQ-----    | --APTQDVTK  | IVSRKVCG-- | ----GLVPCA  |
| RNIT--DLG-  | VISSAE-ARR | NIMRLSQRLV  | KTFCVNI STA | YGQSWTALS-  | --ETTKDITVR | ITTRKMCE-P | GOPTGVVLC A |
| TNLTEISP--  | GLSAK--GAT | EIVKLAQRMT  | LNYYRGITSP  | SVDKWQKIQ-  | -VENVAQNMS  | FMTRKVNNEP | GELTGIVLSA  |
| S-----EDHT  | GLSHA--GTK | SILKLAQRMK  | LNFYSGITAS  | CIHKWEKIL-  | -AENVGDTR   | ILTRKSLI-- | --PSGIVLSA  |
| IQTLPSPDRS  | EVITTGEARR | SVMKLGEMV   | KNFNEMITMS  | GKIDFPQQS-  | -----KNGVR  | VSIRMN-IEA | GOPPGIVVSA  |
| VPALPNNDNP  | GVVQTI GRN | SVMHLGERML  | KNFAWMKMV   | NKLDLFPQSE  | ---TNNSGIR  | IGVRIN-NEA | GOPPGLIVCA  |
| MTDFPPTDYP  | GVVKTIEGRR | SVMSLGERML  | KNFAWIMKMS  | DKLDLPQSG   | ---ANNSGVR  | ISVRTN-TEA | GOPPLIVCA   |
| TNIPAGDL CV | ITSPE--GRK | SMLKLAERMV  | TSFCTGVGAS  | TAHAWTILS-  | --ATGSDDVR  | AMTRKSMDDP | GRPPGIVLSA  |
| PASSRDLGG   | VILSPE-GKR | SMMRLAQRMI  | SNYCLSVRS   | NNTRSTVVS-  | --ELNEVGIR  | VTAKS----  | PEPNGTVLCA  |
| PATSSIDLGG  | VIPSPE-GKR | SIMRLAHRMV  | SNFCLSVGTS  | NNTRSTVVS-  | --GLDEFGIR  | VTSHKSR--- | HEPNGMVLCA  |
| SNIPACDL SV | ITSPE--GRK | SMLKLAERMV  | MSFCTGVGAS  | TAHAWTILS-  | --TTGSDDVR  | VMTRKSMDDP | GRPPGIVLSA  |
| SNIPG-DLSV  | ITSPE--GRK | SMLKLAERMV  | MSFCSGV GAS | TAHAWTILS-  | --TTGSDDVR  | VMTRKSMDDP | GRPPGIVLSA  |
| TNVPTKDSLG  | VITLA--GRK | SVLKMAQRMT  | QSFYRALI AS | SYHQWTKIT-  | --TKTGQDMR  | VSRKNLHDP  | GEPTGIVVCA  |
| SNIPAGDVGV  | ITSPE--GRK | SMLKLAERMV  | MSFCAGV GAS | TTHITWTILS- | --GSGADDVR  | VMTRKSMDDP | GRPPGIVLSA  |
| STIPTSDMGV  | ITSTE--GRK | SMLKLAERMV  | MSFCGGVTAS  | AAHQWTILS-  | --GSGAEDVR  | VMTRKSVDDP | GRPPGIVLNA  |
| INIPSGDL CV | ITTAE--GRK | SMLKLAERMV  | MSFCTGVGAS  | TAHAWTILS-  | --ATGSDDVR  | VMTRKSMDDP | GRPPGIVLSA  |
| INIPTGDL CV | ITTPE--GRK | SILKLAERMV  | MSFCTGVGAS  | TAHTWTILS-  | --ATGSDDVR  | VMTRKSMDDP | GRPPGIVLSA  |
| INIPAGDL CV | ITSPE--GRK | SMLKLAERMV  | MSFCSGV GAS | TAHAWTILS-  | --ATGSDDVR  | VMTRKSMDDP | GRPPGIVLCA  |
| INIPAGDLGV  | IPSPE--GRK | SILKLAERMV  | TSFCAGVSAS  | TAHTWTILS-  | --GSGAEDVR  | VMTRKSIDDP | GRPPGIILSA  |
| SNIPNGDLGV  | ITSVE--GRK | SMLKLAERMV  | ASFCGGVTAS  | VAHQWTILS-  | --GSGAEDVR  | VMTRKSVDDP | GRPPGIVLNA  |
| SNIPTSDIGV  | ITSSE--GRK | SMLKLAERMV  | VSFCCGVTAS  | VAHQWTILS-  | --GSGAEDVR  | VMTRKSVDDP | GRPPGIVLNA  |
| PDTVSANDSS  | VITQE--GKR | SMLKLAARRMT | ENFCAGVSAS  | SAREWSKLDG  | AAGSIGEDVR  | VMTRKSVDEP | GEPPGVVLSA  |
| SNIPNGDLGV  | ITSIE--GRK | SMLKLAERMV  | ASFCGGVTAS  | AAHQWTILS-  | --GSGAEDVR  | VMTRKSVDDP | GRPPGIVLNA  |
| SNIASRDLGG  | VPSAS--GRR | SMLKLAQRMT  | NNFCAGVSAS  | TVHTWTILS-  | --GSGDDDVR  | VMTRKSVNDP | GEPPGIVLSA  |
| SNIASRDLGG  | VPSAS--GRR | SMLKLAQRMT  | NNFCAGVSAS  | TVHTWTILS-  | --GSGDDDVR  | VMTRKSVNDP | GEPPGIVLSA  |
| STVPTRDH-T  | AITAS--GRR | SMLKLAQRMT  | DNFCAGVCAS  | TVHKWNKLN-  | -AGNVDEdVR  | VMTRKSIDDP | GEPPGIVLSA  |
| SSTSTRDLGG  | VIPSPE-GRR | SMMKLAQRMT  | NNFCTSVGTS  | NSHRSTILS-  | --GSNEVGVR  | VTVHKSSD-P | GOPNGIVLSA  |

|            |            |            |            |            |             |           |            |
|------------|------------|------------|------------|------------|-------------|-----------|------------|
| 730        | 740        | 750        | 760        | 770        | 780         | 790       | 800        |
| .... ....  | .... ....  | .... ....  | .... ....  | .... ....  | .... ....   | .... .... | .... ....  |
| ATSVWMPVSE | RRLFDLGN E | RLRSEWDILS | NGGPMKEMAH | IAGHPRSN S | VSLLRASA-I  | NAN-----  | ---QSSMLIL |
| ATSVWLPAP  | QRLYDFLRNE | RMRCEWDILS | NGGPMQEMAH | ITKQDQCG-- | VSLLRASNA-M | NAN-----  | ---QSSMLIL |



|             |            |            |             |             |            |            |       |              |
|-------------|------------|------------|-------------|-------------|------------|------------|-------|--------------|
| ATSEWLPVPP  | KRVDFDLRDE | NSRNEWIDLS | NGGVQVEMAH  | IANGRDITGNC | VSLLRVNS-A | NSS        | ----- | ---QSNMLIL   |
| ATSEWLPAPP  | NTVDFDLREA | THRHNWDVLC | NGEMMHKIAE  | ITNGIDKRCNC | ASLLRHG--- | HTS        | ----- | ---KSKMMIV   |
| VSVTLPLPYSH | QVDFDLRDN  | QRLSQLEILF | MGSSFQEVAAH | IANGSHLGNS  | ISLLRINVES | NSS        | ----- | ---HNVELML   |
| VSTTLPFSH   | HQVDFDLRQ  | HHQSLELVLF | NGNSPHEVAH  | IANGSHPGNC  | ISLLRINVAS | NSW        | ----- | ---HNVELML   |
| STSVWLPVNO  | HTLFAFLSHL | SFRHEWDILT | NDTTMBETIR  | IQKAKRHGNI  | ISLLKIVN-- | -----      | ----- | ---NGMLVL    |
| ATSLWLPVTQ  | QRLFEFLCDG | KCRNQWDILS | NGASMENTLL  | VPKGOQEGSC  | VSLLRAG-N  | DQN        | ----- | ---ESSMLIL   |
| SSSLAIPLTP  | LQVFAFLQNL | DTRQOWDILS | YGTVVFETAR  | IVTGSSETNC  | VTLRVHPTH  | EENNDKMVVQ | ----- | ---DCKDDMLML |
| GSSLSLPLPP  | VQVYDFLKNL | EVRHQWDVLC | HGNPATEAAR  | FVTGSNPRNT  | VSELEPSIRD | I          | ----- | ---NTKLMIL   |
| GSSLSLPLPP  | LQVYDFLRNL | EVRHQWDVHC | QGNPTEAAR   | FVTGPDQKNN  | VTELQSSVG  | -----      | ----- | ---EYKLMIL   |
| ATSEWLPVPP  | KRVDFDLRDE | NSRSEWDILS | NGGLVQVEMAH | IANGRDPGNC  | VSLLRVNS-A | NSS        | ----- | ---QSNMLIL   |
| ATTFWLPNSP  | QNVFNFLKDE | RTRPQWDVLS | NGNAVQEVAAH | ISNGSHPGNC  | ISVLRGSNAT | HS         | ----- | ---NNMLIL    |
| ATSEWLPISP  | QNVFNFLKDE | RTRPQWDVLS | NGNSVQEVAAH | ITNGSNPGNC  | ISVLRGFNAS | SSQ        | ----- | ---NNMLIL    |
| ATSEWLPVAP  | KRVDFDLRDE | NSRSEWDILS | NGGLVQVEMAH | IANGRDPGNS  | VSLLRVNS-G | NSG        | ----- | ---QSNMLIL   |
| ATSEWLPVAP  | KRVDFDLRDE | NSRKEWDILS | NGGMVQVEMAH | IANGHEPGNC  | VSLLRVNS-G | NSS        | ----- | ---QSNMLIL   |
| SSSLWLPVSP  | ALLFDFLDE  | ARRHEWDALS | NGAHVQSIAN  | LSKGODRGNS  | VAIQTVKS-- | --R        | ----- | ---EKSIVWL   |
| ATSEWLPVPP  | KRVDFDLRDE | NSRSEWDILS | NGGLVQVEMAH | IANGRDPGNC  | VSLLRVNS-A | NSS        | ----- | ---QSNMLIL   |
| ATSEWLPVPP  | KRVDFDLRDE | SSRSEWDILS | NGGVVQVEMAH | IANGRDHGNC  | VSLLRVNS-T | NSN        | ----- | ---QSNMLIL   |
| ATSEWLPVQS  | KRMDFDLRDE | NHRSEWDILS | NGGEVQVEMAH | IANGRDPGNC  | VSLLRVNS-A | NSS        | ----- | ---QSNMLIL   |
| ATSEWLPVPS  | KKVDFDLRDE | NHRSEWDILS | NGGQVQVEMAH | IANGRDPGNC  | VSLLRVNS-T | NSS        | ----- | ---QSNMLIL   |
| ATSEWLPVPP  | KRVDFDLRDE | NHRSEWDILS | NGGQVQVEMAH | IANGRDPGNC  | VSLLRVIS-A | NSS        | ----- | ---QSNMLIL   |
| ATSLWLPVPP  | KKVDFDLRDE | NSRNEWIDLS | NGGLVQVVDH  | IANGQDPGNC  | VSLLRVNT-V | NSN        | ----- | ---QSNMLIL   |
| ATSEWLPVPP  | AAVDFDLRDE | TSRSEWDILS | NGGAVQVEMAH | IANGRDHGNS  | VSLLRVNS-A | NSN        | ----- | ---QSNMLIL   |
| ATSEWLPVPP  | KRVDFDLRDE | SSRSEWDILS | NGGIVQVEMAH | IANGRDQGNC  | VSLLRVNS-S | NSN        | ----- | ---QSNMLIL   |
| PTSVWLPVAP  | EKLNFNLRDE | QLRAEWDILS | NGGPMQVEMAH | IAKGQEHGNS  | VSLLRASA-M | SAN        | ----- | ---QSSMLIL   |
| ATSEWLPVPP  | KRVDFDLRDE | TSRSEWDILS | NGGAVQVEMAH | IANGRDHGNC  | VSLLRVNS-A | NSN        | ----- | ---QSNMLIL   |
| ATSMWLPVSP  | ARVFQFLRDE | RLRSEWDILS | NGGMVQVEMAH | IAKGQDPGNS  | VSLLRVNA-M | NSS        | ----- | ---QSNMLIL   |
| ATSMWLPVSP  | ARVFQFLRDE | RLRSEWDILS | NGGIVQVEMAH | IAKGQDPGNS  | VSLLRVNA-M | NSN        | ----- | ---QSNMLIL   |
| ATSVWLPVSP  | QRLFDFLRNE | RLRSEWDILS | NGGPMQVEMAH | IAKGQDHGNC  | VSLLRASA-M | NAN        | ----- | ---QSSMLIL   |
| ATTFWLPVSP  | QNVFNFLKDE | RTRPQWDVLS | NGNAVQEVAAH | IANGSHPGNC  | ISVLRAFNTS | HN         | ----- | ---NMLIL     |

| 810         | 820        | 830         | 840         | 850         | 860         | 870        | 880        |           |              |
|-------------|------------|-------------|-------------|-------------|-------------|------------|------------|-----------|--------------|
| QETSIDAA-G  | AVVVYAPVDI | PAMQAVMNGG  | -DSAYVALLP  | SGFAILPNGQ  | AGTQRCAAE   | RN         | -----      | ---SIGNGG |              |
| QETCIDAS-G  | ALVVYAPVDI | PAMHVMNGG   | -DSSYVALLP  | SGFALPDGG   | IDGG        | -----      | -----      | ---GSGDGD |              |
| QESCTDPT-A  | SEVIYAPVDI | VAMNIVLNGG  | -DPDYVALLP  | SGFALPDGN   | ANS GAP     | ----       | -----      | -----     |              |
| QETSTDPT-A  | SEVLYAPVDM | TSMDITLHGG  | GDPDEVVILP  | SGFAIFPDGT  | GKPGGKE     | ----       | -----      | -----     |              |
| QETCTDNS-G  | SLLVYSTVDP | VAVQLAMNGE  | -DPSEIPLLP  | VGFSSVVPNP  | SDGVEGSSVS  | SP         | -----      | -----     |              |
| QESCTDNS-G  | SLIVYSTVDV | DSIQQAMNGE  | -DSSNIPLLP  | LGFSIVVPNP  | PEGISVNSHS  | PP         | -----      | -----     |              |
| QETWINDAS-G | AMVVYAPVET | NSIELVKRGE  | -NSDSVKELP  | SGFSIVPDGV  | N           | -----      | -----      | ---GSYH   |              |
| QETWINDVS-G | ALVVYAPVDI | PSMNTVMSGG  | -DSAYVALLP  | SGFSILPDGS  | SSSS        | -----      | ---D       | ---DTDGG  |              |
| QDCYMDAL-G  | GMIVYAPVDM | ATMHFAVSGE  | VDPESHIPILP | SGFVITSSDGR | RSTVEDGG    | --         | -----      | -----     |              |
| QDSFKDAL-G  | GMVAYAPVDI | NTACAALS GD | IDPTTIPILP  | SGFMISRDR   | PSEGEAEGGS  | Y          | -----      | -----     |              |
| QDGFIDAL-G  | GMVVYAPMNL | NTAYSALSQ   | VDPSTIPILP  | SGFITSRDHS  | PSSSEVDGGS  | M          | -----      | -----     |              |
| QESCTDAK-G  | SYVVYAPVDI | VAMNIVLSGG  | -DPDYVALLP  | SGFALPDGP   | GVNNGG      | ----       | -----      | ---ILEI   |              |
| QESSTDSS-G  | AFVVYSPVDL | AALNIAMS GE | -DPSYIPLLS  | SGFITSPDGN  | GSNSEQGGAS  | TSS        | -----      | -----     | ---G         |
| QESCTDSSSA  | ALVIYTPVDL | PALNIAMSQ   | -DTSYIPLLP  | SGFAISPDP   | ---         | SSKGG      | ----       | -----     | -----        |
| QESCTDAS-G  | SYVIYAPVDI | IAMNVVLSGG  | -DPDYVALLP  | SGFALPDGS   | ARGGGSANA   | SAGAGVEGGE | GNNLEVVTIT | -----     | ---          |
| QESCTDAS-G  | SYVIYAPVDI | VAMNVVLSGG  | -DPDYVALLP  | SGFALPDGS   | VGGD        | ----       | -----      | ---Q      | ---HQEMVSTSS |
| QDSSTNSY-E  | SVVVYAPVDI | NTTQLVLGH   | -DPSNIQILP  | SGFSIIPDGV  | ESRPLVITST  | QD         | -----      | -----     | ---          |
| QESCTDPT-G  | SYVIYAPVDI | VAMNVVLSGG  | -DPDYVALLP  | SGFALPDGA   | VLHGG       | ----       | -----      | -----     | ---ILDV      |
| QESCTDAS-G  | SYVIYAPVDV | VAMNVVLN GG | -DPDYVALLP  | SGFALPDGP   | AGSNMQDGD   | ----       | -----      | -----     | ---GV        |
| QESCTDST-G  | SYVIYAPVDI | SAMNIVLSGG  | -DPDYVALLP  | SGFALPDGP   | GYGSAG      | ----       | -----      | -----     | ---ILDV      |
| QESCTDST-G  | SYVIYAPVDI | SAMNIVLSGG  | -DPDYVALLP  | SGFALPDGP   | GYGPAG      | ----       | -----      | -----     | ---ILDV      |
| QESCTDST-G  | SYVIYAPVDI | AAMNIVLSGG  | -DPDYVALLP  | SGFALPDGP   | GFSPGI      | ----       | -----      | -----     | ---ILDV      |
| QESCTDAS-G  | SEVIYAPVDI | VAMNVVLSGG  | -DPDYVALLP  | SGFALPDSP   | KCMAVTNSG   | ----       | -----      | -----     | ---INDL      |
| QESCTDAS-G  | SYVVYAPVDI | VAMNVVLN GG | -DPDYVALLP  | SGFALPDGP   | S-GNAQA AVG | E          | -----      | -----     | ---NGS       |
| QESCTDAS-G  | SYVIYAPVDV | VAMNVVLN GG | -DPDYVALLP  | SGFALPDGP   | AHDGGDGDGG  | ----       | -----      | -----     | ---VGV       |
| QETCTDAS-G  | SMVVYAPVDI | PAMQLVMNGG  | -DSTYVALLP  | SGFALPDGP   | -----       | -----      | -----      | -----     | ---SSVGA     |
| QESCTDAS-G  | SYVVYAPVDV | VAMNVVLN GG | -DPDYVALLP  | SGFALPDGP   | PPAGAAPSHG  | E          | -----      | -----     | ---GL        |
| QESCTDVS-G  | SLVIYAPVDI | PAMNVLQGG   | -DPAYVALLP  | SGFALPDGP   | GGDRGALGNE  | QG         | -----      | -----     | ---GQLTEI    |
| QESCTDVS-G  | SLVIYAPVDI | PAMNVLQGG   | -DPAYVALLP  | SGFALPDGP   | GGERGS LGVD | QG         | -----      | -----     | ---SGLTES    |
| QETCIDAA-G  | SLVVYAPVDI | PAMHVMNGG   | -DSAYVALLP  | SGFAIVPDGP  | RSHGPI SNHG | VN         | -----      | -----     | ---GNTGG     |

QESCIDSS-G SLVVCYCPVDL PAINVAMSGE -DPSYIPLLE SGFTITPDGH LEQGDGASTS SST-----G

| 890         | 900        | 910         | 920        | 930        | 940         | 950           |         |
|-------------|------------|-------------|------------|------------|-------------|---------------|---------|
| .....       | .....      | .....       | .....      | .....      | .....       | .....         | ..      |
| CMEEG-SLL   | TVAFQILVN  | --SLPTAKLT  | VESVETVNNL | ISCTVQRIKA | ALHCDST---  | ~~~~~         | HDG1    |
| QRPVGGGSL   | TVAFQILVN  | --NLPTAKLT  | VESVETVNNL | ISCTVQRIKA | ALQCES----  | -----         | ANL2    |
| GGD--GGSL   | TVAFQILVD  | --SVPTAKLS  | LGSVATVNNL | IACVVERIKA | SMSCETA---  | -----         | HDG2    |
| -----GGSL   | TISFQMLVE  | --SGPEARLS  | VSSVATTENL | IRTTVRRIKD | LFPCQTA---  | -----         | HDG3    |
| -----S      | CLLTVAIQVL | GS--NVTTE   | RLDLSTVSVI | NHRICATVNR | ITSALVN---  | -----DVG N-   | HDG4    |
| -----SCLL   | TVGIQVLAS  | --NVPTAKPN  | LSTVTTINNH | LCATVNOITS | ALSNTITPVI  | ASSADVSNQE V- | HDG5    |
| RGNTGGGCLL  | TFGLQILVG  | --INPTAALI  | OQTVKSVETL | MAHTIVKIKS | ALDLQT----  | -----         | FWA     |
| VNQESKGCCLL | TVGFQILVN  | --SLPTAKLN  | VESVETVNNL | IACVVERIKA | ALRIPA---   | -----         | HDG7    |
| -----TLL    | TVAFQILVSG | K-ANRSREVN  | EKSVDTVSAL | ISSTIQRIKQ | LLNCPEC---  | -----         | HDG8    |
| -----TLL    | TVAFQILVSG | P-SYSPDTNL  | EVSATTVNTL | ISSTVQRIKA | MLKCE-----  | -----         | HDG9    |
| -----TLL    | TFAFQIEVTG | P-SYYTDLNL  | KDSATTVNTL | VSSAVQRIKA | MLNCE-----  | -----         | HDG10   |
| GS--GGSL    | TVAFQILVD  | --SVPTAKLS  | LGSVATVNSL | IKCTVERIKA | AVKCENNA--- | -----         | GbML1   |
| RA-SASGSL   | TVGFQIMVS  | --NLPTAKLN  | MESVETVNNL | IGTTVHQIKT | ALSGPTASTT  | A-----        | HDG11   |
| -----GSL    | TVGFQIMVS  | --GLQPAKLN  | MESMETVNNL | INTTVHQIKT | TLNCPSTA--- | -----         | HDG12   |
| GSC--GGSL   | TVAFQILVD  | --SVPTAKLS  | LGSVATVNSL | IKCTVERIKA | ALACDGA---  | -----         | ATML1   |
| GSC--GGSL   | TVAFQILVD  | --SVPTAKLS  | LGSVATVNSL | IKCTVERIKA | AVSCDVGGGA  | -----         | PDF2    |
| DRNSQGGSL   | TFALQTLIN  | --PSPAACKLN | MESVESVTNL | VSVTLHNIKR | SLQIEDC---  | -----         | GL2     |
| GS--GGSL    | TVAFQILVD  | --SAPTAKLS  | LGSVATVNSL | IKCTVERIKA | AVSCENT---  | -----         | VvHD1   |
| GS--GGSL    | TVAFQILVD  | --SVPTAKLS  | LGSVATVNSL | IACVVERIKA | AVSGES-NPQ  | Q-----        | SbHD1   |
| GS--GGSL    | TVAFQILVD  | --SVPTAKLS  | LGSVATVNSL | IKCTVERIKA | AVMCDNA---  | -----         | PtHD1   |
| GS--GGSL    | TVAFQILVD  | --SVPSVKLS  | LGSVATVNSL | IKCTVERIKA | AVMCDNP---  | -----         | PtHD2   |
| GS--GGALV   | TVAFQILVD  | --SIPTAKLS  | LGSVATVNNL | IKCTVERIKA | AVTCETA---  | -----         | RcHD1   |
| GT--GGSL    | TVAFQILVD  | --SVPTAKLS  | LGSVATVNSL | ISCTVDRIKA | AVMRENP---  | -----         | PaHD1   |
| GSG--GGSL   | TVAFQILVD  | --SVPTAKLS  | LGSVATVNSL | IACVVERIKA | AVCRDS-NPQ  | -----         | ROC1    |
| GS--GGSL    | TVAFQILVD  | --SVPTAKLS  | LGSVATVNSL | IACVVERIKA | AVSGES-NPQ  | -----         | ROC2    |
| EHKTG-SLL   | TVAFQILVN  | --SQPTAKLT  | VESVETVNNL | IFCTIKKIKT | ALQCD-----  | -----         | ZmOCL1  |
| DAGG-GGSL   | TVAFQILVD  | --SVPTGKLS  | LGSVATVNSL | IACVVERIKA | AVCAEAGNPQ  | -----         | ZmOCL5  |
| GRG--TGSL   | TVAFQILVS  | --SIPSARLS  | LESVATVNNL | ISCTVQRIKS | ALLVEDA---  | -----         | PhHDZ41 |
| SRG--TGSL   | TVAFQILVS  | --SIPSARLS  | LESVATVNNL | ISCTVQRIKS | ALLVEDA---  | -----         | PhHDZ43 |
| GSSSVGGSP   | TVAFQILVN  | --SSPTAKLT  | VESVETVNNL | ISCTVQRIKA | ALQCES----  | -----         | GhHOX1  |
| HGRSSGGSL   | TVAFQILVS  | --SLPSAKLN  | LDSVTIVNNL | IANTVQRIKA | ALNCPSS---  | -----         | GhHOX3  |

Supplementary Figure 7
